# Supplementary material for: pISTil: a pipeline for yeast two-hybrid Interaction Sequence Tags identification and analysis
Source: PubMed Central journal article supplement (PMC2776022; doi:10.1186/1756-0500-2-220), 2009-10-29
Supplement: 1756-0500-2-220-S1.pdf [file 1756-0500-2-220-S1.pdf]

# **p I S T i l**

**a pipeline for Interaction Sequence Tags identification and analysis**

**Release v1.0.6: 2/10/2009  
Johann PELLET**

# pISTil documentation

## Table of contents:

|                                                                                                                                                  |           |
|--------------------------------------------------------------------------------------------------------------------------------------------------|-----------|
| <b>ABOUT THIS DOCUMENTATION .....</b>                                                                                                            | <b>5</b>  |
| <b>ABOUT THE LICENCE AGREEMENT .....</b>                                                                                                         | <b>5</b>  |
| <b>I. INTRODUCTION.....</b>                                                                                                                      | <b>6</b>  |
| <b>II. REQUIREMENTS .....</b>                                                                                                                    | <b>6</b>  |
| 1. PostgreSQL -- <a href="http://www.postgresql.org">http://www.postgresql.org</a> .....                                                         | 7         |
| 2. Apache Web Server -- <a href="http://www.apache.org">http://www.apache.org</a> .....                                                          | 7         |
| 3. MAMP (for Macintosh OS system) -- <a href="http://www.mamp.info">http://www.mamp.info</a> .....                                               | 7         |
| 4. Perl -- <a href="http://www.cpan.org">http://www.cpan.org</a> .....                                                                           | 7         |
| 5. Standard Perl modules -- <a href="http://www.cpan.org">http://www.cpan.org</a> .....                                                          | 7         |
| 6. Bioperl version 1.5.2 or higher -- <a href="http://www.bioperl.org">http://www.bioperl.org</a> .....                                          | 7         |
| 7. NCBI BLAST Toolkit -- <a href="ftp://ftp.ncbi.nih.gov/blast/executables/release/">ftp://ftp.ncbi.nih.gov/blast/executables/release/</a> ..... | 7         |
| 8. Staden package -- <a href="http://staden.sourceforge.net">http://staden.sourceforge.net</a> .....                                             | 8         |
| 9. Phred software - <a href="http://www.phrap.org/phredphrapconsed.html">http://www.phrap.org/phredphrapconsed.html</a> .....                    | 8         |
| 10. JDK -- <a href="http://www.sun.com">http://www.sun.com</a> .....                                                                             | 8         |
| 11. csh shell .....                                                                                                                              | 8         |
| <b>III. INSTALLATION AND CONFIGURATION.....</b>                                                                                                  | <b>9</b>  |
| 1. Downloading and unzipping pISTil .....                                                                                                        | 9         |
| 2. Creating the pISTil database:.....                                                                                                            | 9         |
| 3. Setting up the pISTil configuration file .....                                                                                                | 10        |
| 4. Downloading and creating the BLAST databases: .....                                                                                           | 12        |
| 5. Creating the pattern BLAST database .....                                                                                                     | 12        |
| 6. Configuring "the bait parameter file" .....                                                                                                   | 12        |
| 7. Setting up the pISTil interface.....                                                                                                          | 13        |
| 8. Edit library and vector data.....                                                                                                             | 14        |
| <b>IV. RUNNING pISTil:.....</b>                                                                                                                  | <b>15</b> |
| 1. Quick start:.....                                                                                                                             | 15        |
| 2. Running with your own bait parameter file:.....                                                                                               | 15        |
| 3. Example with the two HCV datasets: .....                                                                                                      | 15        |
| 4. Miscellaneous.....                                                                                                                            | 20        |
| 5. pISTil processing time .....                                                                                                                  | 20        |
| <b>V. pISTil WEB INTERFACE.....</b>                                                                                                              | <b>21</b> |
| 1. Viewing projects.....                                                                                                                         | 21        |
| 2. Viewing plates .....                                                                                                                          | 22        |
| 3. Viewing protein-protein interaction (ppi) .....                                                                                               | 25        |
| 4. Search page.....                                                                                                                              | 27        |
| 5. PSI-MI export.....                                                                                                                            | 30        |
| 6. Information.....                                                                                                                              | 32        |

|                                                                                                    |           |
|----------------------------------------------------------------------------------------------------|-----------|
| <b><u>VI. pISTil PROGRAM FLOW</u></b> .....                                                        | <b>34</b> |
| <b><u>VII. pISTil FILES:</u></b> .....                                                             | <b>37</b> |
| <b><u>VIII. BUGS AND PROBLEMS</u></b> .....                                                        | <b>39</b> |
| <b><u>1. Environment variable STADLIB</u></b> .....                                                | <b>39</b> |
| <b><u>2. Stash not found</u></b> .....                                                             | <b>39</b> |
| <b><u>Annex</u></b> .....                                                                          | <b>40</b> |
| <b><u>Annex 1: pISTil Entity-relationship (ER) diagram</u></b> .....                               | <b>40</b> |
| <b><u>Annex 2: PostgreSQL table listing</u></b> .....                                              | <b>42</b> |
| <b><u>Annex 3: Config analyse.pm example, working with both HCV datasets</u></b> .....             | <b>45</b> |
| <b><u>Annex 4: Define bait examples</u></b> .....                                                  | <b>46</b> |
| <b><u>Annex 5: config.inc example, working with both HCV datasets</u></b> .....                    | <b>47</b> |
| <b><u>Annex 6: PSI-MI from Ontology browser for sequence databases</u></b> .....                   | <b>48</b> |
| <b><u>Annex 7: Vector pPC86 used for the HCV examples and its pattern</u></b> .....                | <b>49</b> |
| <b><u>Annex 8: pISTil workflow schema</u></b> .....                                                | <b>50</b> |
| <b><u>Annex 9: The trace sequence, according to several Phred processing options</u></b> .....     | <b>51</b> |
| <b><u>Annex 10: Interaction Sequence Tag (IST) identification pipeline statistics</u></b> .....    | <b>52</b> |
| <b><u>Annex 11: Schema of the BLASTN and the split correction to find the cDNA start</u></b> ..... | <b>53</b> |



## ABOUT THIS DOCUMENTATION

This documentation is intended to inform informatics or bioinformatics users on how to use **pISTil**. Several formatting conventions are used throughout this documentation:

*Commands are written in this style.*

`pISTil output is written in this style.`

**Names of programs, packages are written in this style.**

[References to web sites are written in this style.](#)

## ABOUT THE LICENCE AGREEMENT

pISTil v1.0.6 29/07/2009  
INSERM U851, I-MAP team,  
21 Avenue Tony Garnier, Lyon F-69007 France

Copyright (C) 2009 I-MAP INSERM U851

All scripts, programs and applications used are free software; you can redistribute them and/or modify them under the terms of the GNU General Public License as published by the Free Software Foundation; either version 2 of the License, or (at your option) any later version.

They are distributed in the hope that it will be useful, but WITHOUT ANY WARRANTY; without even the implied warranty of MERCHANTABILITY or FITNESS FOR A PARTICULAR PURPOSE. See the GNU General Public License for more details.

You should have received a copy of the GNU General Public License along with pISTil; if not, write to the Free Software Foundation, Inc., 59 Temple Place, Suite 330, Boston, MA 02111-1307 USA

## I. INTRODUCTION

**pISTil** (a pipeline for Interaction Sequence Tag identification and analysis) is a collection of scripts and programs - running on both Linux and MacOS X systems - for fast analysis of large yeast two-hybrid sequence datasets. **pISTil** is composed of (i) a database, (ii) a web interface and (iii) a **perl** script.

The **pISTil perl** script takes as input files sequence chromatogram data generated from automated sequencing technology, in either (i) Applied Biosystems INC. (ABI) format or (ii) Standard Chromatogram Format (SCF).

The **pISTil** package provides a combination of functionalities that allow:

- to convert trace files to bases and quality indices by using **Phred** software
- to analyse chromatograms with different **Phred** parameters and/or **BlastX** protein sequence databases
- to automatically carry out sequence alignments and store aligned sequences
- to store results from all analysis in a relational database
- to apply different search criteria, such as the frequency of interaction, the number of distinct interactors etc... and different filters (E-value, identity, frame)
- to export lists of interaction in different file formats (Excel, PSI-MI: Proteomics Standards Initiative - Molecular Interactions)

The **pISTil** distribution includes, as a case study, the HCV (**H**epatitis **C** **V**irus) dataset produced by the IMAP team (**I**nfection **M**APping) that you can be used with the tutorial described in section IV.3.

Note: **pISTil** was developed to analyse large datasets of cDNA sequences produced by high-throughput yeast two hybrid screens. However, it can be extended to other applications dedicated to protein-protein interaction identification, like MAPPIT (MAMmalian Protein-Protein Interaction Trap), LUMIER (luminescence-based mammalian interactome mapping) or PCA (protein complementation assay) by modifying the open source code available at <http://sourceforge.net/projects/pistil>.

## II. REQUIREMENTS

We have tested the software on MacOS X 10.5.X and Linux, and would recommend the following system specifications:

- Operating Systems:
  - Mac OS X 10.4.x or higher.
  - Linux Fedora 2.6.18-1.2798.fc6 or equivalent
- Server Specifications:
  - 1.5 GB of hard drive space
  - 1 GB of RAM or better

**pISTil** is distributed as a source code for Linux and Macintosh OS X systems.

It runs on top of several software packages. These must be installed and configured before you can run **pISTil**.

You can access to this requirements list on this page:

1. **PostgreSQL** -- <http://www.postgresql.org>

**PostgreSQL** is a powerful, open source relational database system to store various pieces of information: sequences, annotation, alignments, etc. A relational database is an ideal way to store large datasets as it allows very fast storing and retrieval information. To run **pISTil**, you must be able to create and access a **PostgreSQL** database. A diagram of the **pISTil** database structure is included at the end of this document (See Annex 1).

2. **Apache Web Server** -- <http://www.apache.org>

The **Apache** web server is the industry standard open source web server for Unix and Windows systems. For Macintosh OS system, **MAMP** can be used.

3. **MAMP (for Macintosh OS system)** -- <http://www.mamp.info>

**MAMP** installs easily **Apache**, **PHP** and **MySQL** for Mac OS X users.

4. **Perl** -- <http://www.cpan.org>

**Perl** is a high-level programming language and **CPAN** is the Comprehensive Perl Archive Network, a large collection of **Perl** software and documentation.

The **Perl** interpreter is usually present on most Unix distributions. Type *perl -v* at the command line to find which version of **Perl** is available on your system (version 5.8.8 or higher is preferred).

Note: If **Perl** is not installed under */usr/bin/perl*, either make a soft link at the location where **Perl** is installed. Alternatively, you can modify the first line of all **Perl** scripts in the **pISTil** directory so that they point to the correct location.

5. **Standard Perl modules** -- <http://www.cpan.org>

The following **Perl** modules can be found on the CPAN and must be installed for **pISTil** to work:

- **CGI**
- **DBI**
- **Carp**
- **Text::Wrap**
- **Math::BigFloat**

6. **Bioperl version 1.5.2 or higher** -- <http://www.bioperl.org>

**BioPerl** is a collection of **Perl** modules devoted to bioinformatics. It is not usually installed on Unix systems and has to be installed separately. You can find out if it is installed by running *perl -MBIO::Perl -e '1'* from a terminal window. If it doesn't return an error, then **BioPerl** is installed.

7. **NCBI BLAST Toolkit** -- <ftp://ftp.ncbi.nih.gov/blast/executables/release/>

**BLAST** (**B**asic **L**ocal **A**lignment **S**earch **T**ool) is used to search in a formatted database for sequences that show similarities to a query sequence. Within **pISTil**, it is used to identify sequences that show significant similarities to a well-annotated protein, and thereby to putatively assign protein accession number to each IST (**I**nteraction **S**equence **T**ag). Two binaries are required, **blastall** (which carries out the search) and **formatdb** (which prepares a database for searching).

## 8. Staden package -- <http://staden.sourceforge.net>

**pISTil** uses **Pregap4**, a **Staden package** program, to prepare sequence chromatogram data for analysis. **pISTil** has been tested with rel-1-6-0 release of **Staden package**. Install the package as described in the accompanying documentation. Make sure:

- to include the directory where the **Staden** binaries reside in your path.
- to set the STADENROOT environment variable.
- to source the appropriate **Staden** script as described in the **Staden** documentation.

For **pISTil**, you have to set the 'STADLIB' environment variable. If you use **sh**, or variants such as **bash**, and install **Staden** package in [/usr/local/staden](#) , set 'STADLIB' with the commands:

```
>STADLIB=/usr/local/staden/lib
>export STADLIB
```

Note: **pISTil** uses its own **Pregap4** configuration file 'pregap4\_pistil.config' provided in the **pISTil** directory. All settings can be changed to specify their own parameters.

## 9. Phred software - <http://www.phrap.org/phredphrapconsed.html>

The **Phred** software reads DNA sequencing trace files, calls bases and assigns a quality value to each called base.

**pISTil** has been tested for the 0.020425.c version of **Phred**.

Install **Phred** as described in the INSTALL file that comes with the **Phred** software. Make sure to set 'PHRED\_PARAMETER\_FILE' environment variable correctly. It should point to the phredpar.dat **Phred** parameter file that comes with **Phred**.

Since the **Phred** base calling depends on the correct identification of chromatogram 'source', please check if your **Phred** parameter file includes these lines:

```
"DT3730POP7{ET}.mob"      terminator      energy-transfer      ABI_3700
"DT3730POP7{BDv3}.mob"   terminator      big-dye               ABI_3700
```

Get **Phred** from [bge@u.washington.edu](mailto:bge@u.washington.edu) (Brent Ewing).

## 10. JDK -- <http://www.sun.com>

To view trace files on the web, the **pISTil** interface uses **BMC TraceViewer** (available from [http://www.hgsc.bcm.tmc.edu/downloads/software/trace\\_viewer/index.html](http://www.hgsc.bcm.tmc.edu/downloads/software/trace_viewer/index.html)), a Java applet that allows you to see DNA sequencing traces. The **BMC TraceViewer** source files are included in the **pISTil** source code. You just have to check that the **JDK** is installed.

## 11. csh shell

A shell is a program which provides a user interface. With a shell, users can type in commands and run programs on a Unix system. The **C shell** was written by Bill Joy at the University of California at Berkeley. Check if you have the **C shell** in your Unix system or install it.



### III. INSTALLATION AND CONFIGURATION

#### 1. Downloading and unzipping pISTil

The home page of the **pISTil** project is available on the Sourceforge at <http://sourceforge.net/projects/pistil>.

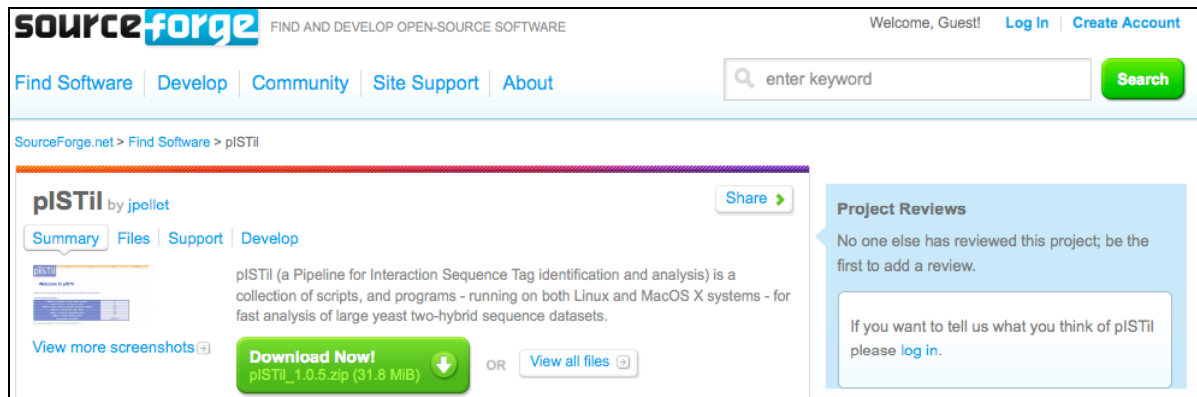

To download the **pISTil** sources, click the Download link.

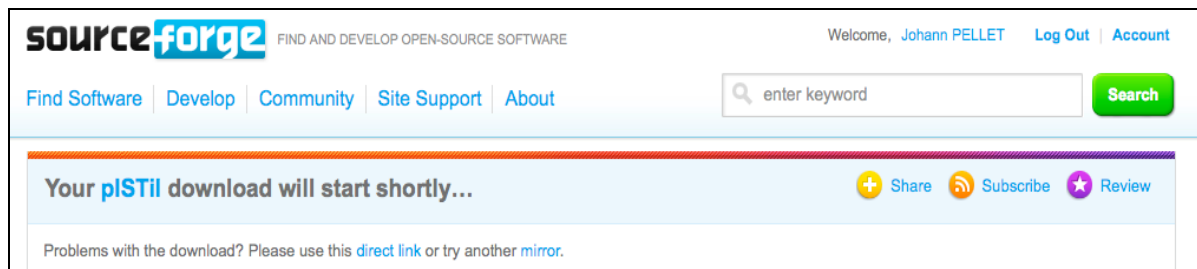

The download of the last release of **pISTil** will start.

You can also browse **pISTil** releases by clicking on the "Files" link:

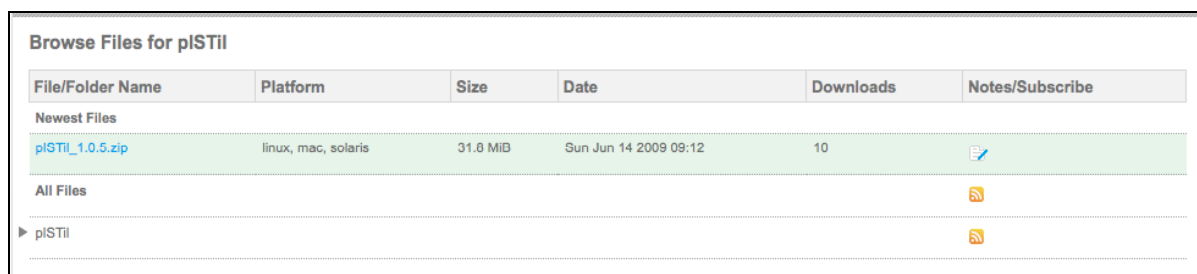

| File/Folder Name                 | Platform            | Size     | Date                  | Downloads | Notes/Subscribe |
|----------------------------------|---------------------|----------|-----------------------|-----------|-----------------|
| Newest Files                     |                     |          |                       |           |                 |
| <a href="#">pISTil_1.0.5.zip</a> | linux, mac, solaris | 31.6 MiB | Sun Jun 14 2009 09:12 | 10        |                 |
| All Files                        |                     |          |                       |           |                 |
| ▶ pISTil                         |                     |          |                       |           |                 |

Note: - You don't need to create a Sourceforge account to download **pISTil**.

Unzip and move the **pISTil** directory to a subdirectory in your main web directory:

- For **MAMP** users, the standard web directory is [/Applications/MAMP/htdocs](#).
- For Linux users, the standard web directory varies, but generally takes the form of [/var/www/html](#).

#### 2. Creating the pISTil database:

**pISTil** uses a single database with 16 tables.

The "create\_database.csh" script in the [pISTil/db](#) folder creates automatically the database.

You must use a **PostgreSQL** account, which has all privileges. If you don't have it, use the following command in your shell to create the **pISTil** user 'IST\_user' with password 'istdb':

```
>createuser IST_user -d -l -W -P
```

- At the questions:

```
>Shall the new role be a superuser? (y/n)
```

- You can answer no 'n'.

```
>Shall the new role be allowed to create more new roles? (y/n)
```

- You can answer no 'n'.

```
>Password:
```

- Write the password, for example 'istdb'.

Note: Depending on your work environment, the password can be requested at the beginning.

Now you can launch the **csH** script in the **pISTil/db** directory to create the **pISTil** database. 'create\_database.csh' needs two arguments: the first one is the name of the database (ex: 'pistil'), the second one is the user of the database (ex: 'ist\_user'). To execute the **csH** script go in the **pISTil/db** directory and launch the following command:

```
>csH create_database.csh pistil ist_user
```

Note: - In the example below, we use 'pistil' for the name of the database, and 'ist\_user' for the user name. However you can use the database and user names you want.  
- This script will try to drop the database given in argument before starting to create it.

Now you have the **pISTil** database installed with, by defaults, some data used for the analysis of the HCV dataset in 5 tables (see section IV.3).

Note: - The data for 'method', 'midb' and 'reference' tables come from PSI-MI (<http://www.psidev.info/>).  
- For more information about the **pISTil** tables, please see Annex 2.

### 3. Setting up the pISTil configuration file

**pISTil** uses a central configuration file named "config\_analyse.pm" that contains variables and settings that can be customized. It is localized in the **pISTil** root directory.

- You must configure each variable before using it:
  - **dbname**: name of the database you created for **pISTil**.
  - **dbhost**: name of the **PostgreSQL** server.
  - **dbuser**: user that has access privileges for the **pISTil** database.
  - **dbpass**: password for that user.

- **path\_to\_pregap\_config**: location of the **pregap** config file used by **pISTil**.
- **temp\_dir**: some of the scripts need some scratch space. **pISTil** will create this temporary directory in the **pistil** root directory.
- **path\_to\_databank\_pattern**: central location of the **BLAST** databases used to search and localize pattern before cDNA. See Annex 7 for explanation about this pattern.
- **path\_to\_databank\_blastX**: central location of the **BLAST** databases used to identify ISTs.
- **MI\_method**: PSI-MI identifier for interaction detection method.
- **phred\_arg**: **Phred** processing options. Value can be 'nocall' if you want to disable **Phred** base calling and to set the current sequence to the ABI base calls that are read from the input files. If you want to set trimming error probability, value can be for example '-trim\_cutoff 0.01'. The default value is 0.05. Please read more about trimming in the **Phred** documentation.
- **dataset\_dir**: directory where you placed the zip file containing your data to analyse.
- **regex\_plate**: regular expression for pulling out the plate name.
- **regex\_location**: regular expression for pulling out the well location.
- **save\_BLASTN**: yes ('y') or no ('n') for saving or not BLASTN results in a file.
- **save\_BLASTX**: yes ('y') or no ('n') for saving or not BLASTX results in a file.
- **log\_file**: yes ('y') or no ('n') for keeping or not a log file.

Note: To see how to configure the "config\_analyse.pm" file for the HCV datasets analysis, please see Annex 3.

- About regular expression: A regular expression ( also "regex" ) is a string that is used to describe or match a set of strings according to certain syntax rules. You must specify two regular expressions to define the plate name and the well location compared to the name of traces. If you are not familiar with regex rules, you can find a short help in the configuration file.

Example with this trace name: HCV15\_1\_96 -A01-Y2H\_AD-9

If we 'translate' this name in regex form:

|        |            |    |    |    |    |           |
|--------|------------|----|----|----|----|-----------|
| Name:  | HCV15_1_96 | -  | A  | 0  | 1  | -Y2H_AD-9 |
| Regex: | ^\w+       | \- | \w | \d | \d | .*        |
|        |            |    |    |    |    |           |

We define the plate name like '**HCV15\_1\_96**'. To match it, we use '()':

|        |                 |    |    |    |    |           |
|--------|-----------------|----|----|----|----|-----------|
| Name:  | HCV15_1_96      | -  | A  | 0  | 1  | -Y2H_AD-9 |
| Regex: | ^( <b>\w+</b> ) | \- | \w | \d | \d | .*        |

The well location is '**A01**':

|        |            |    |             |    |     |           |
|--------|------------|----|-------------|----|-----|-----------|
| Name:  | HCV15_1_96 | -  | A           | 0  | 1   | -Y2H_AD-9 |
| Regex: | ^\w+       | \- | ( <b>\w</b> | \d | \d) | .*        |

Note: Your trace file names must be similar in one plate to work with one regex. Indeed if you have one chromatogram file like 'HCV15\_1\_96-A01-Y2H\_AD-9' and the second one 'HCV15\_1\_96\_A02-Y2H\_AD-9', it will not work with the regex '^(**\w+**)-\w\d\d.\*'.

So you have two options: change the name of the trace file or find a regex that works with both, like '^(**\w+**)[**\-\_\b**]\w\d\d.\*'.

- About Phred processing options: **Phred** can automatically remove low-quality base calls from the start and the end of DNA sequences, a process called "trimming" or "clipping". When generating trimmed output files, you will lose bases at the start and the end of sequences, so trimming should be used with care. If you plan to generate trimmed sequences, you may first want to experiment with different cutoff scores to see which setting works better for you. (See Annex 9).

#### 4. Downloading and creating the BLAST databases:

**pISTil** relies on protein sequence databases to analyse the screening data. You have to use a sequence database referenced in the PSI-MI 2.5 ontology (see Annex 6). Each database has its repository in the [pISTil/localdb](#) directory.

For instance you can download NCBI and ENSEMBL flat files from:

- **NCBI**: <ftp://ftp.ncbi.nih.gov/blast/db/FASTA/> for GenBank database.
- **Ensembl**: <http://www.ensembl.org/info/data/ftp/index.html> for Ensembl database.

Move the downloaded file in the fasta format to [pISTil/localdb/ddbj-embl-genbank/](#) for the GenBank database or to [pISTil/localdb/ensembl/](#) for the Ensembl database.

You must then use this file to construct the index for the **BLAST** database by using the 'formatdb' program from NCBI. In the following example, **formatdb** is used to construct the **BLAST** database called 'Homo\_sapiens.NCBI36.50.pep.all' from the fasta file 'Homo\_sapiens.NCBI36.50.pep.all.fa' containing multiple proteic sequences:

In the directory [pISTil/localdb/ensembl/](#) type:

```
> formatdb -p T -o -i ./Homo_sapiens.NCBI36.50.pep.all.fa
```

Note: - Download and create the database may take several minutes depending both on your internet connection and your processor speed  
- If you want use your own database which is not referenced by PSI-MI (see Annex 6), move your fasta file into [pISTil/localdb/other/](#)

#### 5. Creating the pattern BLAST database

**pISTil** relies on **BLASTN** to accurately locate the beginning of cDNA insert by making use of a database of vector construct sequences (see Annex 11). Thus, according to the cDNA library screened, **pISTil** will align the vector sequence before the cDNA and thus will retained only cDNA sequence for protein assignation. Accurate localization of the vector construct is also crucial to characterise cDNA that were encoded "in-frame" into the two-hybrid system (or other systems, according to the fusion protein).

To insert library and vector data into the database, you have to use the **pISTil** interface (see section III.8).

#### 6. Configuring "the bait parameter file"

The file 'define\_bait' is located by default in the **pISTil** root directory. This file is used to identify baits present in each of the 96 wells of a plate.

To configure this file for the **pISTil** software you must give: the first then the last well where one bait is present, the product of this bait and optionally its database accession number and its PSI-MI database identifier. The values are separated by tabulations.

Example:

| First well | Last well | Bait product | Bait proteinid | PSIMI database id |
|------------|-----------|--------------|----------------|-------------------|
| A01        | A01       | NS3          | CAB46677       | 0475              |
| A02        | A04       | NS4          | CAB46677       | 0475              |

In this example, in A01, the bait is NS3, and from A02 to A04 the bait is NS4, both from Hepatitis C virus (taxon=11103). The GenBank accession for these both bait products is CAB466677, a polyprotein. The PSIMI database identifier for GenBank is 0475.

'Bait proteinid', 'PSIMI database id' are required if you are going to export protein-protein interaction lists to PSI-MI format. 'Bait proteinid' is the identifier of the bait according to the database described in the following field. 'PSIMI database id' is the PSI-MI identifier for this database (See Annex 6 to choose the right identifier). If you use a personal database to identify your bait, interactions involving this bait won't be exportable in PSI-MI format.

If you have several plates for a single project, you can analyse all traces at once. However you must configure the bait parameter file by specifying the plate name before description of the plate content.

Example:

| First well   | Last well | Bait product | Bait proteinid | PSIMI database id |
|--------------|-----------|--------------|----------------|-------------------|
| --HCV15_1_96 |           |              |                |                   |
| A01          | H12       | NS3          | CAB46677       | 0475              |
| --MARIE1     |           |              |                |                   |
| A01          | H12       | NS4          | CAB46677       | 0475              |

In this example, pISTil will analyse two plates, 'HCV15\_1\_96' with NS3 in all wells, and 'MARIE1' with NS4 in all wells.

- Note:
- Don't forget to write '--' before the plate name.
  - The plate name must be identical to the one extracted from the regex (section III.3)
  - Don't change the configuration file format to identify baits.

## 7. Setting up the pISTil interface

The pISTil web interface (ex: <http://localhost/pISTil/www>) provides a powerful and user-friendly way to query and to navigate throughout the pISTil results.

First, you need to fill up a configuration file named 'config\_www.inc' in the [pISTil/www/inc](http://localhost/pISTil/www/inc) directory. This file contains many variables and settings that can be customized:

- **\$HOST\_NAME**: name of the PostgreSQL server.
- **\$DATABASE\_NAME**: name of the database you created for pISTil.
- **\$DATABASE\_USER**: user that has all access privileges for the pISTil database.
- **\$DATABASE\_PASSWORD**: password for that user.
- **\$LOCAL\_DIR**: location of the pISTil directory which contains all the data and the scripts for the interface.
- **\$FORMATDB\_EXEC**: absolute path to **formatdb** to use when formatting the blast pattern database. Type *which formatdb* in your terminal to know its path.

- **\$LOCALDB\_PATH**: absolute path for the 'localdb' subdirectories in the **pISTil** directory.

Note: To see how to configure the 'config\_www.inc' file for the HCV datasets, please see Annex 5.

## 8. Edit library and vector data

To insert or remove library or vector data in the **pISTil** database, use the **pISTil** web interface.

- In the **pISTil** home page, select "Library screening" from the "Information" drop-down menu. This page shows you all vectors and libraries already inserted in the database.
- When you want to insert a new library you need to specify a vector. So you must first insert a vector if it's not already in the database.

- To insert a vector, fill out the vector form, and click the button insert.

ISTS are screened to identify the cDNA which starts after the Gal4 pattern. Each plate is linked to a particular library during its analysis.

| Vector | Comment                                        | Pattern sequence                  | Length | Remove                |
|--------|------------------------------------------------|-----------------------------------|--------|-----------------------|
| pPC86  | Adapter Sall in 5 and NotI in 3,digest by NotI | ACAGGGATGTTTAATACCACTACAATGGAT... | 87     | <input type="radio"/> |

Note: When you insert a new vector, the **pISTil** interface will automatically format the pattern database.

After that, the new vector will appear in the vector field of the library form.

- To insert a library, fill out the library form, and click the button insert.

- When you want to remove a vector or a library, select it and click to the remove selected vector or library button. Note that if you delete a vector, the database server also deletes any libraries associated with that vector.

## IV. RUNNING pISTil:

### 1. Quick start:

Running **pISTil** is very simple once the configuration files have been set on.

The default command in your shell is:

```
>perl ist_analyse.pl <zip_file>
```

Input zip file containing all the traces from one or more plates of the same project.

Note: The zip file is one of the archive files in [pISTil/dataset](#) directory.

### 2. Running with your own bait parameter file:

If you have more than one configuration file to define the baits or if you change its name 'define\_bait', run **pISTil** with a second argument.

```
>perl ist_analyse.pl <zip_file> <your_config_bait_file>
```

### 3. Example with the two HCV datasets:

In this example, we analyse two datasets from I-MAP team experiments (de Chassey B, Navratil V, Tafforeau L *et al.*, Hepatitis C Virus infection protein network. *Molecular Systems Biology* 4:230, 2008).

These two datasets are distributed with **pISTil** and already in the [pISTil/dataset](#) directory. HCV.zip contains 96 trace files from yeast two-hybrid screening against a *Homo sapiens* spleen library. HCV2.zip contains 96 traces from two hybrid screening against a *Homo sapiens* fetal brain library.

We consider that the **pISTil** database has already been created as described in section III.2, using 'pistil' as database name, 'ist\_user' as **PostgreSQL** user and 'istdb' as password. Please adapt the corresponding variables in the "config\_analyse.pm" and "config\_www.inc" files if you have used other parameters.

As a case study, we have analysed all chromatograms to annotate ISTs based on the RefSeq protein database (NCBI Reference Sequence (RefSeq): a curated non-redundant sequence database of genomes, transcripts and proteins. Pruitt KD, Tatusova, T, Maglott DR *Nucleic Acids Res* 2007 Jan 1;35(Database issue):D61-5).

Download the 'human.protein.faa.gz' file from [ftp://ftp.ncbi.nih.gov/refseq/H\\_sapiens/mRNA\\_Prot/](ftp://ftp.ncbi.nih.gov/refseq/H_sapiens/mRNA_Prot/) into the [pISTil/localdb/refseq/](#) directory.

To unzip the compressed file, execute in your terminal window:

```
>gunzip human.protein.faa.gz
```

Now we have to format this file to construct the index for the **BLAST** database by using **formatdb** program from NCBI.

In the directory [pISTil/localdb/refseq/](#) execute this command:

```
> formatdb -p T -i ./human.protein.faa -o -n refseq_human_prot
```

Please ensure to correctly:

- configure the config\_analyse.pm file (see Annex 3) localized in the [pISTil](#) directory
- configure the config\_www.inc file (see Annex 5) localized in the [pISTil/www/inc](#) directory

For the demo, library and vector data were already integrated into the **pISTil** database, so you don't have to insert them for this example. Hence, in the library and vector page in the web interface, you can see these vector data:

| Vector | Comment                                        | Sequence                           | Length |
|--------|------------------------------------------------|------------------------------------|--------|
| pPC86  | Adapter Sall in 5 and NotI in 3,digest by NotI | ACAGGGATGTTTAAATACCACTACAATGGAT... | 87     |

And these library data:

| Library              | Supplier              | Species      | Tissue      | Cellular | Gateway | Vector |
|----------------------|-----------------------|--------------|-------------|----------|---------|--------|
| Hs_fetal_brain_pPC86 | Invitrogen (ProQuest) | Homo Sapiens | Fetal Drain | -        | f       | pPC86  |
| Hs_spleen_pPC86      | Invitrogen (ProQuest) | Homo Sapiens | Spleen      | -        | f       | pPC86  |

Let's start the first analysis with HCV.zip.

First we check the file 'define\_bait' localized in the [pISTil](#) directory.

All baits in this plate are the same viral protein, NS3. The protein GenBank accession number is ' CAB46677' and the PSI-MI identifier for GenBank is MI:0475.

|            |           |              |                |                   |
|------------|-----------|--------------|----------------|-------------------|
| First well | Last well | Bait product | Bait proteinid | PSIMI database id |
| A01        | H12       | NS3          | CAB46677       | 0475              |

- Now we can run the pipeline:

```
>perl ist_analyse.pl HCV.zip
```

Your prompt shell shows you:

```
#####
Check your pISTil configuration file..... please wait
All parameters in the configuration file seem to be good.
Check your Phred argument.Please wait
Phred will be executed without basecalling!

#####:
Before starting, pISTil needs some information about the project to analyse
List of projects in the pISTil database:
No project in the pISTil database
Choose a project or create a new one (0)
Project identifier=
```



Write '0' to create a new project.

```
Project identifier= 0
You decide to create a new project:
Project name:
```

Choose a project name and a description:

```
Project name: Hepatitis C virus
Project description: Screening from the IMAP team
All the data needed to create this new project is now recorded

-----:
Choose the library used for the screen.
List of libraries in the pISTil database.
1 | Hs_spleen_pPC86 | Homo Sapiens | Spleen | | pPC86
2 | Hs_fetal_brain_pPC86 | Homo Sapiens | Fetal Brain | | pPC86
Choose a library identifier:
Library identifier:
```

You must select the appropriate library for the analysis. This first dataset comes from a screen against the *Homo sapiens* spleen library, identified by '1'.

```
Library identifier= 1
pISTil will use the library identifier 1
Unzip your zip file and check your raw files
Unzip HCV.zip

*CHECK ALL RAW FILE NAMES BEFORE STARTING THE PIPELINE
Is your regex is correct for HCV15_1_96-A01-Y2H_AD-9?
Plate name=HCV15_1_96, Location=A01.
Choose yes (y) or no (n):
```

**pISTil** analyses all traces files and tests you regex. If it's correct, write 'y' for yes:

```
Choose yes (y) or no (n):y
pISTil has detected 1 plate(s)
Results: 96 raws checked and validated.
Check plate HCV15_1_96.
It's a new plate for this project.
#####:
Now pISTil running the analysis at Sun Jan 4 22:52:8 2009
.....
End pISTil at Sun Jan 4 22:56:49 2009
-----
Blast statistics:
Number of corrections = 45
Number of BlastX hits=93
Number of BlastX no hits=3
-----
Do you want insert your data on the pISTil database?
Yes (y) or No (n)
```

At the end of the **pISTil** pipeline, you have the choice to insert automatically all results in the **pISTil** database, or to do it manually using sql files generated during the analysis.

```
Yes (y) or No (n)
y
INSERT 0 1
INSERT 0 1
You have inserted your data. pISTil success.
```

At this step, we have analysed the first dataset. Now we have to change two parameters before starting with the second one, named 'HCV2.zip'. First we must be sure that all regex in the "config\_analyse.pm" file are correct according to trace file names. Here, regex are the same than for the first analysis. Secondly, we must change the "define\_bait" file and configure it according to the criteria of the second plate.

Here are the lines for the "define\_bait" file:

| First well | Last well | Bait product | Bait proteinid | PSIMI database id |
|------------|-----------|--------------|----------------|-------------------|
| A01        | F12       | NS3          | CAB46677       | 0475              |
| G01        | H02       | NS2          | CAB46677       | 0475              |
| H03        | H12       | NS3          | CAB46677       | 0475              |

Now you can launch the **pISTil** pipeline with the second dataset 'HCV2.zip'.

```
>perl ist_analyse.pl HCV2.zip
```

```
#####
Check your configuration file..... please wait
All parameters in the configuration file seem to be good.
Check your Phred argument.Please wait
Phred will be executed without basecalling!

#####:
Before starting, pISTil needs some information about the project to analyse
List of projects in the pISTil database:
0..... Create a new one
1 | Hepatitis C virus | Screening from the IMAP team | 2009-01-04 23:27:13
Choose a project or create a new one (0)
Project identifier=
```

In this tutorial, we analyse this new dataset in the same project than before. So we type '1'.

Project identifier= 1  
pISTil will use the project identifier 1

-----:  
Choose the library used for the screen.

List of libraries in the pISTil database.

|   |  |                      |  |              |  |             |  |  |  |       |
|---|--|----------------------|--|--------------|--|-------------|--|--|--|-------|
| 1 |  | Hs_spleen_pPC86      |  | Homo Sapiens |  | Spleen      |  |  |  | pPC86 |
| 2 |  | Hs_fetal_brain_pPC86 |  | Homo Sapiens |  | Fetal Brain |  |  |  | pPC86 |

Choose a library identifier:

Library identifier=

We select the appropriate library, identifier '2':

Library identifier= 2  
pISTil will use the library identifier 2

Unzip your zip file and check your raw files  
Unzip HCV2.zip

**\*CHECK ALL RAW FILE NAMES BEFORE STARTING THE PIPELINE**

Is your regex correct for MARIE1-A01-Y2H\_AD-96.ab?

Plate name=MARIE1 , Location=A01.

Choose yes (y) or no (n):

**pISTil** asks if your regex is correct:

Choose yes (y) or no (n):**y**

pISTil has detected 1 plate(s)

Results: 96 raws checked and validated

Check plate HCV15\_1\_96.

It's a new plate for this project.

#####:

Now pISTil running the analysis at Sun Jan 4 23:46:3 2009

**pISTil** analyses your traces and identifies ISTs.

End pISTil at Sun Jan 4 23:53:34 2009

-----  
Blast statistics:

Number of corrections = 13

Number of BlastX hits=95

Number of BlastX no hits=1

-----  
Do you want insert your data on the pISTil database?

Yes (y) or No (n)

We insert all information in the **pISTil** database.

Yes (y) or No (n)

**y**

You have inserted your data. pISTil success.

Note: A summary of the **pISTil** analysis results for the complete HCV dataset is given in Annex 10.

#### 4. Miscellaneous

Running '*perl ist\_analyse.pl*' without argument will display **pISTil** error: "Must give a zip file name localized in dataset directory".

Running '*perl ist\_analyse.pl --help*' or '*perl ist\_analyse.pl -h*' option will display **pISTil** quick help launch.

Running '*perl ist-analyse.pl --fasta*' or '*perl ist\_analyse.pl -f*' option allows the use of ASCII fasta sequence files instead of chromatogram files. The method of analysis remains the same, without **Phred** extraction and quality analysis.

#### 5. pISTil processing time

Computer configuration:

Machine: MacBook pro 15"

CPU: 2.33 GHz intel Core 2 Duo

Memory: 2Go 667MHz

| Dataset                           | HCV.zip | HCV2.zip |
|-----------------------------------|---------|----------|
| Plate name                        | HCV15   | MARIE1   |
| Number of baits                   | 96      | 96       |
| Number of ISTs                    | 93      | 95       |
| CPU time for a plate (sec)        | 238,77  | 390,58   |
| CPU time for one IST (median sec) | 1,85    | 3,17     |

## V. pISTil WEB INTERFACE

After pipeline processing of the chromatogram dataset and data insertion into the **pISTil** database, open your web browser and go to the web folder in which **pISTil** is located, for example <http://localhost/pISTil/www/>.

You should see a welcome page with some global statistics about all analyses run by **pISTil** and a menu to navigate throughout results:

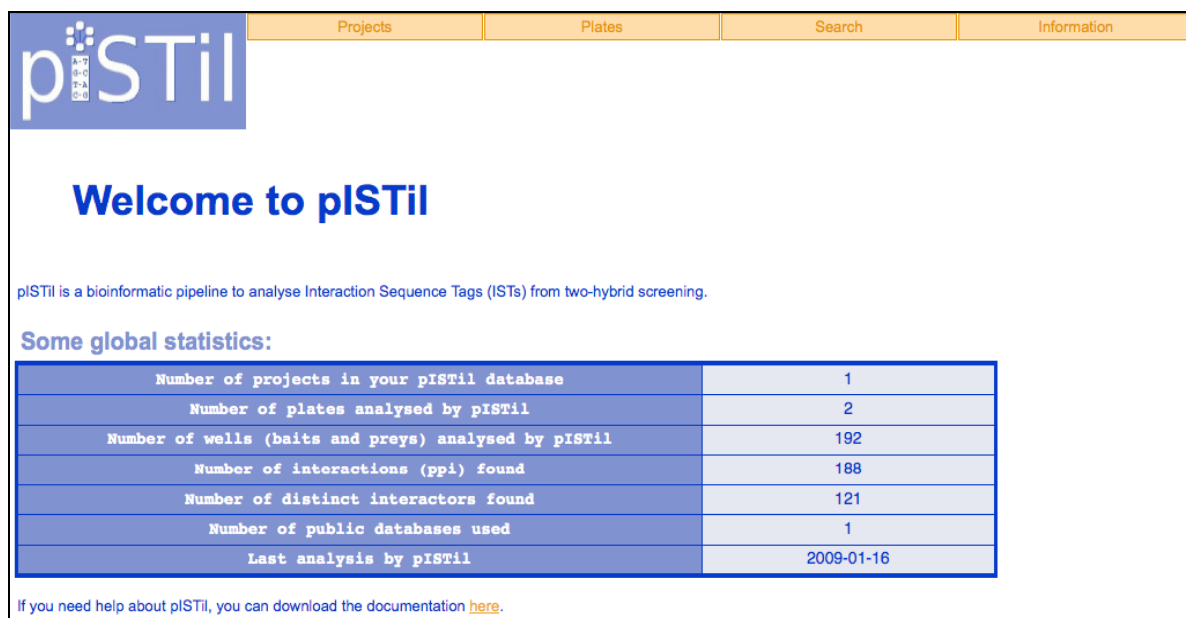

The screenshot shows the pISTil web interface. At the top left is the pISTil logo. To its right are four navigation tabs: "Projects", "Plates", "Search", and "Information". Below the logo is the heading "Welcome to pISTil". A sub-heading reads "pISTil is a bioinformatic pipeline to analyse Interaction Sequence Tags (ISTs) from two-hybrid screening." Below this is a section titled "Some global statistics:" followed by a table:

| Statistic                                            | Value      |
|------------------------------------------------------|------------|
| Number of projects in your pISTil database           | 1          |
| Number of plates analysed by pISTil                  | 2          |
| Number of wells (baits and preys) analysed by pISTil | 192        |
| Number of interactions (ppi) found                   | 188        |
| Number of distinct interactors found                 | 121        |
| Number of public databases used                      | 1          |
| Last analysis by pISTil                              | 2009-01-16 |

At the bottom of the page, there is a link: "If you need help about pISTil, you can download the documentation [here](#)."

### 1. Viewing projects

Once projects have been added to the database, they can be browsed using the web menu. A project includes one or more plates of DNA sequences, which have been analysed by **pISTil** software to identify interactors.

To see all projects inserted in the **pISTil** database, use the menu and click on the "Projects" tab.

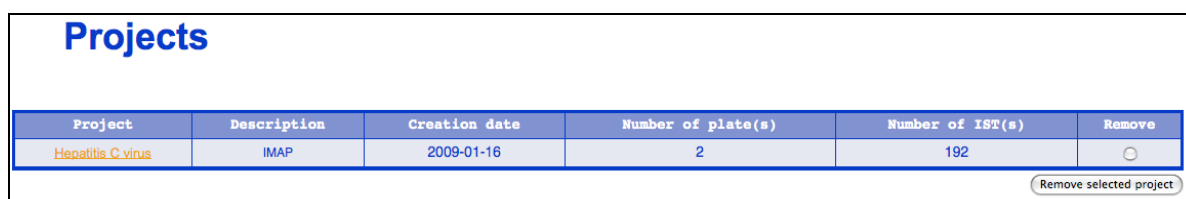

The screenshot shows the "Projects" page. At the top is the heading "Projects". Below it is a table with the following data:

| Project           | Description | Creation date | Number of plate(s) | Number of IST(s) | Remove                |
|-------------------|-------------|---------------|--------------------|------------------|-----------------------|
| Hepatitis C virus | IMAP        | 2009-01-16    | 2                  | 192              | <input type="radio"/> |

At the bottom right of the table, there is a button labeled "Remove selected project".

By checking the remove radio button and clicking to the delete button, you can remove a project and all associated information. A confirmation page will appear:

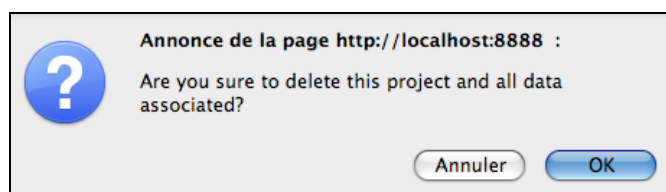

The screenshot shows a confirmation dialog box with a question mark icon. The text inside reads: "Annonce de la page <http://localhost:8888> : Are you sure to delete this project and all data associated?". At the bottom, there are two buttons: "Annuler" and "OK".

By clicking on a project name, you can access detailed information on the current project including the plates that have been added to this project.

### Project information

| Project information |                   |
|---------------------|-------------------|
| Project             | Hepatitis C Virus |
| Description         | IMAP team         |
| Date created        | 2009-01-16        |
| Plates              | 2                 |
| Baits               | 2                 |
| Wells               | 192               |
| Interactions        | 188               |
| Interactors         | 121               |
| Database            | 1                 |

  

| Plate                      | Date created | Wells | Analysis          | ISTs |
|----------------------------|--------------|-------|-------------------|------|
| <a href="#">HCV15_1_96</a> | 2009-01-16   | 96    | <a href="#">1</a> | 93   |
| <a href="#">MARIE1</a>     | 2009-01-16   | 96    | <a href="#">1</a> | 95   |

By clicking on an analysis link, which corresponds to the number of analysis done for this plate, you can access plate analysis information.

If your plate has been analysed only once:

### Plate analysis information

Plate [HCV15\\_1\\_96](#) is analysed 1 times.

| Analysis          | Phred no base calling | Phred trim | Number of pattern | Number of ISTs | Databank                   |
|-------------------|-----------------------|------------|-------------------|----------------|----------------------------|
| <a href="#">1</a> | True                  | -          | 89                | 93             | refseq_human_prot (refseq) |

If you have analysed a plate more than one time, here for example the plate “MARIE1” was analysed with two different **BLASTX** databases and different **Phred** parameters:

### Plate analysis information

Plate [MARIE1](#) is analysed 2 times.

| Analysis          | Phred no base calling | Phred trimming | Number of patterns | Number of ISTs | Databank                                    | Remove                |
|-------------------|-----------------------|----------------|--------------------|----------------|---------------------------------------------|-----------------------|
| <a href="#">1</a> | False                 | 0.01           | 70                 | 82             | Homo_sapiens.NCBI36.50.pep.all.fa (ensembl) | <input type="radio"/> |
| <a href="#">2</a> | True                  | -              | 94                 | 95             | refseq_human_prot (refseq)                  | <input type="radio"/> |

[Remove selected analysis](#)

By clicking on the green arrow, you can access plate information.

## 2. Viewing plates

You can access plate information using the "Plates" tab from the menu or by clicking on a plate name from a project information page, described below.

### Plates

| Plate                      | From project                      | Last analysis date | Number of analysis | Number of bait(s) | Remove                |
|----------------------------|-----------------------------------|--------------------|--------------------|-------------------|-----------------------|
| <a href="#">MARIE1</a>     | <a href="#">Hepatitis C virus</a> | 2009-01-16         | <a href="#">2</a>  | 96                | <input type="radio"/> |
| <a href="#">HCV15_1_96</a> | <a href="#">Hepatitis C virus</a> | 2009-01-16         | <a href="#">3</a>  | 96                | <input type="radio"/> |

[Remove selected plate](#)

If you click on the name of the project, you will be brought to the project information page.

If you click on the name of the plate, you will be brought to the plate information page, which shows you more detailed information about each well on the plate.

If you have analysed a plate more than one time, for example with another **BLASTX** database, you must choose one analysis before seeing all plate information:

**The plate *MARIE1* has been analysed more than one time:**

- Phred base calling with **trim cutoff=0.05** and trace files aligned against **refseq** database called **refseq\_human\_prot**
- No Phred base calling** and trace files aligned against **refseq** database called **refseq\_human\_prot**

Select analysis

Check one of the analysis and click to the "Select analysis" button.

### Plate information

| Information                      |                   | Analysis                   |                            |
|----------------------------------|-------------------|----------------------------|----------------------------|
| Plate                            | HCV15_1_96        | Database used              | refseq_human_prot (refseq) |
| From project                     | Hepatitis C virus | Phred no base calling      | true                       |
| Analysis date                    | 2009-05-17        | Phred trim cutoff          | -                          |
| Number of distinct bait(s) found | 1                 | Number of IST(s)           | 93                         |
| Number of well(s)                | 96                | Number of pattern(s) found | 89                         |

Filter

|                     |                                |                             |                               |
|---------------------|--------------------------------|-----------------------------|-------------------------------|
| by BLAST values     | Identity: <input type="text"/> | Frame: <input type="text"/> | E-value: <input type="text"/> |
| by bait and/or prey | Bait: <input type="text"/>     | Prey: <input type="text"/>  |                               |

Filter

Details of each well:

[Export to tab-delimited format](#)
[Export to XML PSI-MI format](#)
[Sorted by distinct ISTs](#)

| Location | Bait | FPI | Method  | Protein   | Identity(%) | Frame | E-value  | Trace length(nt) | Good quality length(nt) | Sequence             | Pattern |
|----------|------|-----|---------|-----------|-------------|-------|----------|------------------|-------------------------|----------------------|---------|
| A01      | NS3  | ✓   | MI:001B | NP_057698 | 94          | 1     | 1.0E-115 | 1294             | 742                     | <a href="#">View</a> | ✓       |
| A02      | NS3  | ✓   | MI:001B | NP_852469 | 36          | 2     | 0.033    | 1248             | 692                     | <a href="#">View</a> | ✓       |
| A03      | NS3  | ✓   | MI:001B | NP_060474 | 99          | 2     | 1.0E-113 | 1254             | 960                     | <a href="#">View</a> | ✓       |

The top table lists general information about the plate and the analysis done by the **pISTil** software.

By using the filter table, users can choose a combination of filters to generate different lists. After searching and eventually filtering interactions, you can export the resulting table to tab-delimited format for Excel (or a text editor) by clicking on the "export to tab-delimited format" link (please save the file first, before opening). You can also export the list of chosen interactions to MIMIX PSI-MI format (see section V.5).

The second table lists all of the wells along with their analysis results. Bait and Protein columns include direct links towards public databases according to the 'define\_bait' configuration file for baits and the Blast databank used for the IST identification for preys.

You can see the IST sequence corresponding to a well by clicking on the corresponding "View" link.

```

PISTIL fasta IST sequence:

>HCV15_1_96-A01-Y2H_AD-9;Phred base calling with trim cutoff=0.05;662 bp
GGTGGTCCGACCCACGCGTCCCGCCACGCGTCCGGTTGACCTAACCAATGAAGAACAAC
TGATCCACCCTTCTAAAATCAGCCCATCTGAAGATACTAGCAAGAAAATGGCAGCAT
GTTCCTCTCATTACCTGGAATATTGATGGATTAGACTAAACAATCTGTCAGAGAGGCC
TCGAGGGGTGTTCCTACTTACGTTTGTACAGCCAGATGTGATATTTCTACAGGAAGT
TATTCCTCCATATATAGCTACCTAAAGAAGAGATCAAGTAATATGAGATTTATACAGG
TCATGAAGAAGGATATTTACACGCTATAATGTTGAAGAATCAAGAGTAAATTAANAAG
CCAAGAGATTTATCCTTTCCCAAGTACCAAAATGATGAGAACCCTTTATGCTGCATGT
GAATGCTCAGGAAATGAGCTTTGCCCTTATGACATCCCATTTGGAGAGCACCAGAGGGCA
TGCTGGCGAACAATGAATCACTTAAAAATGGTTTTAAAGAAAATGCAAGAGGCTCCAGA
GTCAGCTACAGTTATTTGAGGAGATACAAATCTAAGGGATCGAGAGGTTACCAGATG
TGGTGGTTACCAACAACATTTGGATGCTCTGGAGTTTTTTGGGCAACCTAAACATT
GC

```

General format for the FASTA sequence header:

> HCV15\_1\_96-A01-Y2H\_AD-9; Phred base calling with trim cutoff=0.05; 662 bp  
 Trace file name Phred analysis Length

- If you click on one of the "good quality length" link, you will see the corresponding quality page:

|                        |               |
|------------------------|---------------|
| <b>Color codes:</b>    |               |
| Good quality sequence: | <b>ACGTAC</b> |
| Low quality sequence:  | <b>ACGTAC</b> |

  

```

>HCV15_1_96-A01-Y2H_AD-9 usable length = 1294 good length = 742
GGGGTAAACC CCACCATTGT GATGATGTAT ATAACATCT ATCTCGATGA
080808080808121212 10091008081010111007 070808130911 15162859 394040484037373718 17090808121337282421
TGAAGATACC CCACCAACC CAAAAAAGA GGGTGGGTCG ACCCACGCGT
24212420353539394257 574848434343434343 43434343423332323030 31333942474748484854 575757575757595954
CCGCCCACGC GTCCGGTTGA CCTAACCAAT GAAGAAACAA CTGATTCCAC
5457595757575454 54474743433943395746 544646444643433535 32343843434443484852 575257575757575757
CACTTCTAAA ATCAGCCCAT CTGAAGATAC TCAGCAAGAA AATGGCAGCA
575757575757575454 5459575243434343575757 525243444357575757 59444333334344595957 57575757525752525259
TGTTCTCTCT CATTACCTGG AATATTGATG GATTAGATCT AAACAATCTG
595959575959595252 52575757575252525252 626262626262626262 62626262434362626262 62626262626244435
TCAGAGAGGG CTCGAGGGGT GTGTTCTTAC TTAGCTTTGT ACAGCCCAGA
282832325262626262 525252626262626262 626262525262626262 44624343394344625252 52626262434343394339

```

This HTML page shows Fasta and colour-coded sequence with quality values assigned by **Phred**. During quality analysis, **PreGap4** calculates the average confidence level for a sliding window. The low quality regions (at the start and end of the sequence) are in red.

Note: to compare **Phred** fasta extraction with or without base calling, see Annex 9.

If you click on one of the PSI-MI interaction detection method, you will see the corresponding method page description:

| <b>PSI-MI interaction detection method</b> |            |                                                                                                                                                                                                                                                                                                                                                                                                                                                                                                                                                                                                                                                                                                                                                                                                                                                                                   |          |
|--------------------------------------------|------------|-----------------------------------------------------------------------------------------------------------------------------------------------------------------------------------------------------------------------------------------------------------------------------------------------------------------------------------------------------------------------------------------------------------------------------------------------------------------------------------------------------------------------------------------------------------------------------------------------------------------------------------------------------------------------------------------------------------------------------------------------------------------------------------------------------------------------------------------------------------------------------------|----------|
| MI                                         | Name       | Description                                                                                                                                                                                                                                                                                                                                                                                                                                                                                                                                                                                                                                                                                                                                                                                                                                                                       | PMID     |
| MI.0018                                    | two hybrid | The classical two-hybrid system is a method that uses transcriptional activity as a measure of protein-protein interaction. It relies on the modular nature of many site-specific transcriptional activators (GAL 4), which consist of a DNA-binding domain and a transcriptional activation domain. The DNA-binding domain serves to target the activator to the specific genes that will be expressed, and the activation domain contacts other proteins of the transcriptional machinery to enable transcription to occur. The two-hybrid system is based on the observation that the two domains of the activator need to be non-covalently brought together by the interaction of any two proteins. The application of this system requires the expression of two hybrid. Generally this assay is performed in yeast cell, but it can also be carried out in other organism. | 10967325 |

If you click on one of the location link, you will see the corresponding protein-protein interaction (ppi) page (see section III.3).

If you click on "Sorted by distinct ISTs" link, you can sort interactions by the frequency of observation and as before you can apply multiple filters.



## Plate information

If you want change the analyse, [go back](#)

| Information                      |            | Analysis                   |                            |
|----------------------------------|------------|----------------------------|----------------------------|
| Plate                            | HCV15_1_96 | Database used              | refseq_human_prot (refseq) |
| From project                     | HCV all2   | Phred no base calling      | true                       |
| Analysis date                    | 2009-05-18 | Phred trim cutoff          | -                          |
| Number of distinct bait(s) found | 1          | Number of IST(s)           | 93                         |
| Number of well(s)                | 96         | Number of pattern(s) found | 89                         |

### Filter

|                     |                                |                             |                               |
|---------------------|--------------------------------|-----------------------------|-------------------------------|
| by BLAST values     | Identity: <input type="text"/> | Frame: <input type="text"/> | E-value: <input type="text"/> |
| by bait and/or prey | Bait: <input type="text"/>     | Prey: <input type="text"/>  |                               |

[Filter](#)

### Details of each well:

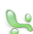

[Export to tab-delimited format](#)

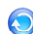

[Back to all Interactions plate](#)

84 records match your search

| Number of IST(s) | Bait | Protein                   | Description                                                                 |
|------------------|------|---------------------------|-----------------------------------------------------------------------------|
| 2                | NS3  | <a href="#">NP_001903</a> | cathepsin L1 preproprotein [Homo sapiens]                                   |
| 2                | NS3  | <a href="#">NP_056475</a> | GTPase, IMAP family member 2 [Homo sapiens]                                 |
| 2                | NS3  | <a href="#">NP_003929</a> | adaptor-related protein complex 3, delta 1 subunit isoform 2 [Homo sapiens] |

### 3. Viewing protein-protein interaction (ppi)

The ppi page lists all information concerning a specific well:

- Project and plate information:

| Project and plate information |                              |
|-------------------------------|------------------------------|
| Project                       | Hepatitis C virus            |
| Description                   | Screening from the IMAP team |
| Plate                         | HCV15_1_96                   |
| Analysis date                 | 2009-01-04                   |

This part shows you the project name, the project description, the plate name for the interaction, and the analysis date.

- Bait information:

| Bait information  |                          |
|-------------------|--------------------------|
| Name              | NS3                      |
| Protein accession | CAB46677                 |
| PSI-MI database   | <a href="#">MI: 0475</a> |
| Well location     | A01                      |

Here you find the bait name, well location in the plate and occasionally its protein accession number and PSI-MI database identifier. If you click on the PSI-MI link you will be redirected to the PSI-MI databases page (see section V.6).

- Trace information:

| Trace information   |                                                                                                                                                                                                                                      |                  |                    |                  |        |      |    |     |     |
|---------------------|--------------------------------------------------------------------------------------------------------------------------------------------------------------------------------------------------------------------------------------|------------------|--------------------|------------------|--------|------|----|-----|-----|
| Raw                 | HCV15_1_96-A01-Y2H_AD-9                                                                                                                                                                                                              |                  |                    |                  |        |      |    |     |     |
| Raw file            | <a href="#">Visualize</a> <a href="#">Download</a>                                                                                                                                                                                   |                  |                    |                  |        |      |    |     |     |
| Nucleotide sequence | GGGGTAAACCCACCATTGTGATGATGATATAACTATCTATCTCGATGATGAAGATACCCACI                                                                                                                                                                       |                  |                    |                  |        |      |    |     |     |
| Quality (bp)        | <table border="1"> <thead> <tr> <th>Usable length</th> <th>Start good quality</th> <th>End good quality</th> <th>Length</th> </tr> </thead> <tbody> <tr> <td>1294</td> <td>27</td> <td>769</td> <td>742</td> </tr> </tbody> </table> | Usable length    | Start good quality | End good quality | Length | 1294 | 27 | 769 | 742 |
| Usable length       | Start good quality                                                                                                                                                                                                                   | End good quality | Length             |                  |        |      |    |     |     |
| 1294                | 27                                                                                                                                                                                                                                   | 769              | 742                |                  |        |      |    |     |     |
| Quality analysis    | <a href="#">View quality file</a>                                                                                                                                                                                                    |                  |                    |                  |        |      |    |     |     |

The nucleic sequence is the trace sequence extracted by **Pregap4**, which has calculated the start and the end location for the good quality sequence.

If you click on one of the "View quality file" link, you will see the corresponding quality page.

If you click on the 'Visualize' link, you see the chromatogram using the **Trace Viewer** applet:

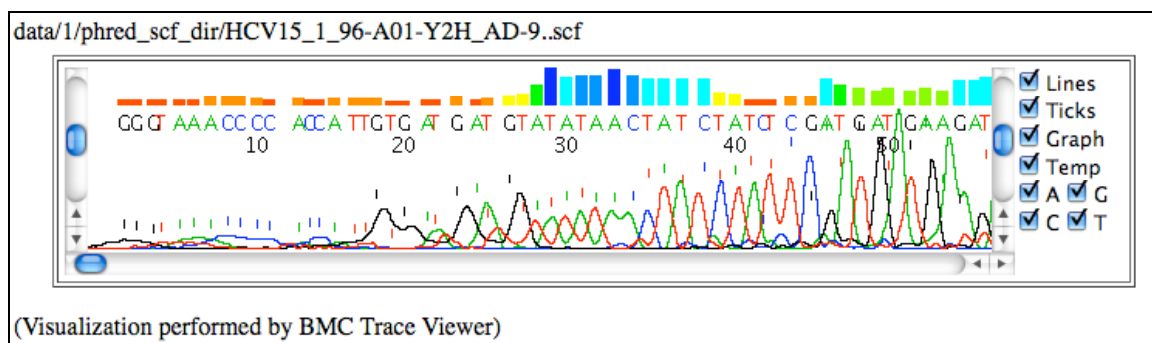

If you click on the 'Download' link, you download the trace (in SCF format) on your computer.

- Phred analysis:

| Phred analysis |                                                              |
|----------------|--------------------------------------------------------------|
| Base calling   | No base calling                                              |
| Phred sequence | GGTGGGTCGACCCACGCGTCCGCCACGCGTCCGGTTGACCTAACCAATGAAGAAACAACT |
| Length         | 1213 bp                                                      |

The **Phred** sequence is the nucleic sequence used by **BLASTX** to identify IST. This sequence depends on the **Phred** parameter. So if you analyse this trace with two different **Phred** parameters, you can obtain two different IST sequences.

- Pattern information:

| Pattern information |                                                                        |        |         |              |        |          |
|---------------------|------------------------------------------------------------------------|--------|---------|--------------|--------|----------|
| Library             | Name                                                                   | Vector | Gateway | Species      | Tissue | Cellular |
|                     | Hs_spleen_pPC86                                                        | pPC86  | False   | Homo Sapiens | Spleen | -        |
| Length pattern      | 87 bp                                                                  |        |         |              |        |          |
| Query               | 21 gatgatgtatataactatctatctcgcgatgatgaagatacccccacaaacccccaaaaaagag 81 |        |         |              |        |          |
| Homology (bp)       |                                                                        |        |         |              |        |          |
| Hit (bp)            | 28 gatgatgtatataactatctat-tcgatgatgaagatacccccacaaacccccaaaaaagag 87   |        |         |              |        |          |
| Correction          | False                                                                  |        |         |              |        |          |

This table contains all information about the pattern search, according to the vector used in the library. To have an explanation about the "correction" term, please see Annex 11.

- Blast information:

| Blast information |                                                                  |
|-------------------|------------------------------------------------------------------|
| Database          | Refseq (refseq_human_prot) created: 2009-01-16                   |
| Program           | BlastX: Compare a nucleotide sequence against a protein database |
| Alignment         | 23 QUERY (nucleotid) 682<br>81 HIT (proteic) 296                 |
| Hit name          | Protein: NP_057698                                               |
| Identity          | 94 %                                                             |
| E-value           | 1.0E-115                                                         |
| Frame             | 1                                                                |
| Hit length        | 362 aa (1086 bp)                                                 |
| Score             | 411                                                              |

This last part of the page gives all **BLASTX** result information. The minimum information about the IST is the protein hit accession number, corresponding to the database used during the analysis. In this case, 94% of query sequence aligned was found identical to the protein NP\_057698. This hit is not in frame with the GAL4-AD pattern (Frame=1).

Note: The frame() method of **pISTil** returns 0, 1, or 2 instead of the expected +1, +2, or +3 in BLAST.

#### 4. Search page

Once you have analysed a number of ISTs, it can become difficult to find individual interactor, bait or a special interaction. The **pISTil** web interface proposes thus a search page which is accessible via the "Search" tab in the menu.

## Search

|                   |                                                                       |
|-------------------|-----------------------------------------------------------------------|
| by bait           | all <input type="button" value="v"/>                                  |
| and/or by prey    | database protein identifier <input style="width: 80%;" type="text"/>  |
| and/or by project | OR short protein description <input style="width: 80%;" type="text"/> |
|                   | all <input type="button" value="v"/>                                  |

You can query interactions found by **pISTil** according to:

- a specific bait: select one bait under the bait drop-down menu.

- a specific prey: specify a protein accession number.
- a short description of a prey.

Alternatively you can filter the result if you select a project using the project drop-down field.

- Example 1: here we search for all interactions of the bait NS2 in the HCV project:

## Search page

|                   |                                                                        |
|-------------------|------------------------------------------------------------------------|
| by bait           | NS2 ▾                                                                  |
| and/or by prey    | database protein identifier <input style="width: 100%;" type="text"/>  |
|                   | OR short protein description <input style="width: 100%;" type="text"/> |
| and/or by project | Hepatitis C Virus ▾                                                    |

After selecting the correct bait and the HCV project, click on the 'Search' button to see the results:

## Search results:

**Filter**

|                               |                                                                                                               |
|-------------------------------|---------------------------------------------------------------------------------------------------------------|
| by BLAST values               | Identity: <input style="width: 50%;" type="text"/> Frame: ▾ E-value: <input style="width: 50%;" type="text"/> |
| by database                   | <input style="width: 100%;" type="text"/>                                                                     |
| by Phred extraction parameter | Base calling trim cutoff: ▾                                                                                   |

**Search results for bait = NS2**

[Export to lab-delimited format](#)  
 [Export to XML-PSI-MI format](#)  
 [Sorted by the number of interactions](#)

Project = Hepatitis C virus

14 records match your search

| ppi | Bait | Method  | Protein      | Identity (%) | Frame | E-value  | Phred base calling | Library                   | Description                                     |
|-----|------|---------|--------------|--------------|-------|----------|--------------------|---------------------------|-------------------------------------------------|
|     | NS2  | MI:0018 | NP_001026884 | 79           | 0     | 1.0E-155 | No                 | Homo Sapiens, Fetal Brain | inverted formin 2 isoform 2 [Homo sapiens]      |
|     | NS2  | MI:0018 | NP_073615    | 86           | 0     | 1.0E-166 | No                 | Homo Sapiens, Fetal Brain | coiled-coil domain containing 21 [Homo sapiens] |
|     | NS2  | MI:0018 | NP_001026884 | 89           | 0     | 1.0E-170 | No                 | Homo Sapiens, Fetal Brain | inverted formin 2 isoform 2 [Homo sapiens]      |
|     | NS2  | MI:0018 | NP_001026884 | 80           | 0     | 1.0E-162 | No                 | Homo Sapiens, Fetal Brain | inverted formin 2 isoform 2 [Homo sapiens]      |
|     | NS2  | MI:0018 | NP_001026884 | 84           | 2     | 1.0E-121 | No                 | Homo Sapiens, Fetal Brain | inverted formin 2 isoform 2 [Homo sapiens]      |

We find 14 records. We can filter the results using the filter table by:

- BLAST values: identity and/or frame and/or e-value
- BLAST database
- **Phred** base calling

- Example 2: we want all interactions in frame with the GAL4-AD pattern and with at least 80% identity and an e-value inferior or equal to 1.E-40. So we used the filter table and we click on the filter button after completing the fields as search criteria.

## Search results:

Filter

|                               |                                          |
|-------------------------------|------------------------------------------|
| by BLAST values               | Identity: 80   Frame: 0   E-value: 1E-40 |
| by database                   |                                          |
| by Phred extraction parameter | Base calling trim cutoff:                |

Filter

Search results for bait = NS2

[Export to tab-delimited format](#)
[Export to XML PSI-MI format](#)
[Sorted by the number of interactions](#)

Project = Hepatitis C virus

9 records match your search

| ppi | Bait | Method  | Protein      | Identity (%) | Frame | E-value  | Phred base calling | Library                   | Description                                |
|-----|------|---------|--------------|--------------|-------|----------|--------------------|---------------------------|--------------------------------------------|
|     | NS2  | MI:0018 | NP_001026884 | 81           | 0     | 1.0E-104 | No                 | Homo Sapiens, Fetal Brain | inverted formin 2 isoform 2 [Homo sapiens] |
|     | NS2  | MI:0018 | NP_001026884 | 89           | 0     | 1.0E-170 | No                 | Homo Sapiens, Fetal Brain | inverted formin 2 isoform 2 [Homo sapiens] |
|     | NS2  | MI:0018 | NP_001026884 | 80           | 0     | 1.0E-162 | No                 | Homo Sapiens, Fetal Brain | inverted formin 2 isoform 2 [Homo sapiens] |
|     | NS2  | MI:0018 | NP_001026884 | 81           | 0     | 1.0E-141 | No                 | Homo Sapiens, Fetal Brain | inverted formin 2 isoform 2 [Homo sapiens] |

After searching and eventually filtering interactions, you can export the resulting table to tab-delimited format for Excel (or a text editor) by clicking on the "export to tab-delimited format" link (please save the file first, before opening):

Search results:

Filter

by BLAST values | by database | by Phred extraction parameter

Search results for bait = NS2

Project = Hepatitis C virus

9 records match your search

| ppi | Bait | Method  | Protein      | Identity (%) | Frame | E-value  | Phred base calling | Library                   | Description                                |
|-----|------|---------|--------------|--------------|-------|----------|--------------------|---------------------------|--------------------------------------------|
|     | NS2  | MI:0018 | NP_001026884 | 81           | 0     | 1.0E-104 | No                 | Homo Sapiens, Fetal Brain | inverted formin 2 isoform 2 [Homo sapiens] |
|     | NS2  | MI:0018 | NP_001026884 | 89           | 0     | 1.0E-170 | No                 | Homo Sapiens, Fetal Brain | inverted formin 2 isoform 2 [Homo sapiens] |

You can also export the list of chosen interactions to MIMIX PSI-MI format (see section V.5).

At last, you can sort the interactions by the number of time they were found (click on the "Sorted by number of interactions" link) as presented in this screenshot:

## Search results:

**Filter**

|                               |                                            |
|-------------------------------|--------------------------------------------|
| by BLAST values               | Identity: 80    Frame: 0    E-value: 1E-40 |
| by database                   | [Dropdown]                                 |
| by Phred extraction parameter | Base calling trim cutoff: [Dropdown]       |

[Filter](#)

**Search results for bait = NS2**

[Export to tab-delimited format](#)    [List of all interactions](#)

**Project = Hepatitis C virus**

3 records match your search

| Number of IST(s) | Bait | Protein                      | Description                                     |
|------------------|------|------------------------------|-------------------------------------------------|
| 5                | NS2  | <a href="#">NP_001026884</a> | inverted formin 2 isoform 2 [Homo sapiens]      |
| 3                | NS2  | <a href="#">NP_073615</a>    | coiled-coil domain containing 21 [Homo sapiens] |
| 1                | NS2  | <a href="#">NP_670721</a>    | proline-rich coiled-coil 1 [Homo sapiens]       |

Like the precedent search, you can eventually filter interactions and export the displayed table.

The column 'Number of IST(s) ' represents the number of IST found for a given protein-protein interaction, *i.e.* for a given bait and prey protein. If you click on it, you will see the interaction domain:

## Interaction domain

**Minimal interaction domain (MID):**  
Click on the image for full resolution of the minimal interaction domain.

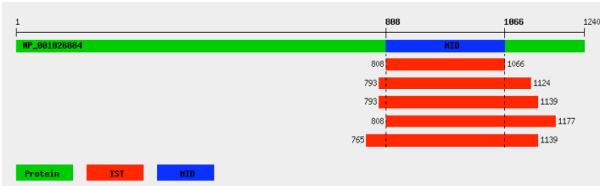

**All interactions between NS2 and NP\_001026884:**  
 Number of IST(s) supporting the interaction: 5 IST(s).

| ppi | Project           | Method  | Frame | Start query (nt) | End query (nt) | Start hit (aa) | End hit (aa) | Identity (%) | Significance | Length alignment (nt) | Hit length (aa) |
|-----|-------------------|---------|-------|------------------|----------------|----------------|--------------|--------------|--------------|-----------------------|-----------------|
|     | Hepatitis C virus | Mi:0018 | 0     | 22               | 798            | 808            | 1066         | 81           | 1.0E-104     | 777                   | 1240            |
|     | Hepatitis C virus | Mi:0018 | 0     | 19               | 1020           | 793            | 1124         | 81           | 1.0E-141     | 1002                  | 1240            |
|     | Hepatitis C virus | Mi:0018 | 0     | 19               | 1065           | 793            | 1139         | 89           | 1.0E-170     | 1047                  | 1240            |
|     | Hepatitis C virus | Mi:0018 | 0     | 22               | 1152           | 808            | 1177         | 80           | 1.0E-162     | 1131                  | 1240            |
|     | Hepatitis C virus | Mi:0018 | 0     | 22               | 1179           | 765            | 1139         | 80           | 1.0E-163     | 1158                  | 1240            |

The first part of this page is a graphic representation of all ISTs supporting the interaction. We represent in blue the minimal interaction domain (MID), in green the protein and in red ISTs.

The second part is a table with all information about IST alignments.

## 5. PSI-MI export

MIMix is the minimum of information required for reporting a molecular interaction experiment, building on the PSI-MI XML v2.5 interchange standard format. You could then thus describe your experimental protein interaction data in a journal article, display it on a website or drop it directly into a public database. The link "export to PSI-MI MIMix format" leads you to a form, where you have to enter some administrative and experimental informations. The validity of the created file depends on the way you fill in the form.

Please note moreover that :

- Only distinct interactions are considered.
- Only "valid" interactions are integrated in the file, *i.e.* interactions involving proteins referenced in a database listed in PSI-MI 2.5.

### PSI-MI form

*The validity of the created file depends on the way you fill up the form below.*  
*Please note moreover that :*  
*- Only distinct interactions are considered.*  
*- Only "valid" interactions will be integrated in the file, i.e. interactions involving proteins referenced in a database listed in PSI-MI 2.5.*

#### Administrative source information

Name:  \* *i.e. usually an organisation name*

Postal address:

Contact email:

#### Publication describing all interactions of the file

Title:

First author name:

Pubmed identifier:

#### The host organism in which the two-hybrid experiments have been performed

Name:  \* *e.g. yeast*

NCBI taxon identifier:  \* *e.g. 4932*

For more informations about PSI-MI and MIMix, see <http://www.psidev.info/index.php?q=node/277> and the reference paper (The minimum information required for reporting a molecular interaction experiment (MIMix). Orchard et al. Nat Biotechnol. 2007 Aug;25(8):894-8).

When the HTML form is entirely filled, click on the "Create" button. A XML file, placed in the [pISTil/www/data](http://www.psidev.info/data) directory and named "export\_psimi\_[date]\_[time].xml", is created and filled in according to MIMix standard with the valid and distinct interactions you have chosen. A new page allows you to see it in your browser or to download it. You can then go back to your search.

### The XML PSI-MI file has been created.

*3 distinct ppi involving 4 distinct interactors listed in the file.*

Click  [here](#) to see it and  [here](#) to download it.

[Go back to your search](#)

By clicking on the "see" link you can visualize the XML file in your browser.

```

<entrySet level="2" version="5" minorVersion="3" xsi:schemaLocation="netsf:psidev:mi http://psidev.sourceforge.net/mi/reI25/src/MI25.xsd">
- <entry>
- <source releaseDate="2009-01-16">
- <names>
<shortLabel>I-MAP INSERM U851</shortLabel>
</names>
- <xref>
<primaryRef db="pubmed" dbAc="MI:0446" id="18985028"/>
</xref>
- <attributeList>
<attribute name="postalAddress">21 Avenue Tony Garnier,69007 Lyon FRANCE</attribute>
<attribute name="contactEmail">vincent.lotteau@inserm.fr</attribute>
<attribute name="createdBy">pISTiI application, 2009 I-MAP INSERM</attribute>
</attributeList>
</source>
- <interactionList>
- <interaction id="1">
- <experimentList>
- <experimentDescription id="1">
- <names>
<shortLabel>de Chassey</shortLabel>
<fullName>Hepatitis C virus infection protein network.</fullName>
</names>
- <hibref>
- <xref>
<primaryRef db="pubmed" dbAc="MI:0446" id="18985028"/>
</xref>
</hibref>
- <hostOrganismList>
- <hostOrganism ncbiTaxId="4932">
- <names>
<shortLabel>yeast</shortLabel>
</names>
</hostOrganism>
</hostOrganismList>
- <interactionDetectionMethod>
- <names>
<shortLabel>two hybrid</shortLabel>
</names>
- <xref>
<primaryRef db="psi-mi" dbAc="MI:0488" id="MI:0018"/>
</xref>
</interactionDetectionMethod>
</experimentDescription>
</experimentList>
- <participantList>
- <participant id="1">
- <interactor id="1">
- <names>
<shortLabel>inverted formin 2 isoform 2 [Homo sapiens]</shortLabel>
</names>
- <xref>
<primaryRef db="refseq" dbAc="MI:0481" id="NP_001026884"/>
</xref>
- <interactorType>
- <names>
<shortLabel>protein</shortLabel>
<fullName>protein</fullName>

```

Note: you can validate your PSI-MI XML file, exported by pISTiI, using the **PSI Validator** here: <http://www.ebi.ac.uk/intact/validator/psiValidation.jsf>

## 6. Information

To see current **BLAST** databases or to add vectors or libraries in the database, use the "Information" tab in the menu.

If you have already analysed sequences, click on the "Databases" drop down menu, you will see which **BLAST** databases are used:

| Databases                                                                           |          |                                   |                         |              |          |         |            |      |
|-------------------------------------------------------------------------------------|----------|-----------------------------------|-------------------------|--------------|----------|---------|------------|------|
|                                                                                     | Category | Name                              | PSIMI                   | Species      | Assembly | Release | Created    | Hits |
|  | refseq   | refseq_human_prot                 | <a href="#">MI:0481</a> | -            | -        | -       | 2009-05-17 | 376  |
|  | Ensembl  | Homo_sapiens.NCBI36.50.pep.all.fa | <a href="#">MI:0476</a> | Homo_sapiens | NCBI36   | 50      | 2009-05-19 | 153  |

Before launching an analysis you must insert in the pISTiI database vector and library information. Click on the "Library and vector" tab from the "Information" drop down menu (See section III.8 to learn how to insert vector and library data).

If you want to know all information about the PSI-MI databases, click on the "PSI-MI databases" tab from the "Information" drop down menu.



## PSIMI database identifier

| MI   | Name                  | Description                                                                                                                                                                                                                                                                                                                                                                                                                                                                                                                | PMID      |
|------|-----------------------|----------------------------------------------------------------------------------------------------------------------------------------------------------------------------------------------------------------------------------------------------------------------------------------------------------------------------------------------------------------------------------------------------------------------------------------------------------------------------------------------------------------------------|-----------|
| 0924 | camjedb               | Camjedb is a comprehensive database for information on the genome of <i>Campylobacter jejuni</i> . <a href="http://www.sanger.ac.uk/Projects/C_jejuni/">http://www.sanger.ac.uk/Projects/C_jejuni/</a>                                                                                                                                                                                                                                                                                                                     | 106882042 |
| 0464 | cygd                  | The MIPS Comprehensive Yeast Genome Database (CYGD) aims to present information on the molecular structure and functional network of the entirely sequenced, well-studied model eukaryote, the budding yeast <i>Saccharomyces cerevisiae</i> . In addition the data of various projects on related yeasts are used for comparative analysis. <a href="http://mips.gsf.de/proj/yeast/CYGD">http://mips.gsf.de/proj/yeast/CYGD</a> . <a href="http://mips.gsf.de/genre/proj/impact">http://mips.gsf.de/genre/proj/impact</a> | 14755292  |
| 0475 | ddbj/embl/genbank     | DDBJ EMBL GenBank Nucleotide Sequence Database Collaboration exchange new and updated data on a daily basis to achieve optimal synchronisation. <a href="http://www.ebi.ac.uk/embl/Contact/collaboration">http://www.ebi.ac.uk/embl/Contact/collaboration</a>                                                                                                                                                                                                                                                              | 14755292  |
| 0850 | encode                | ENCODE (the Encyclopedia Of DNA Elements) seeks to identify all protein-coding genes. The current ENCODE data set is derived from 1% of the human genome and has been selected for analysis in the pilot phase of the project. <a href="http://www.genome.gov/10005107">http://www.genome.gov/10005107</a>                                                                                                                                                                                                                 | 17372197  |
| 0476 | ensembl               | Ensembl is a joint project between the EMBL-EBI and the Wellcome Trust Sanger Institute that aims at developing a system that maintains automatic annotation of large eukaryotic genomes. <a href="http://www.ebi.ac.uk/ensembl">http://www.ebi.ac.uk/ensembl</a>                                                                                                                                                                                                                                                          | 15078858  |
| 0477 | entrez gene/locuslink | LocusLink provides a single query interface to curated sequence and descriptive information about genetic loci. <a href="http://www.ncbi.nlm.nih.gov/LocusLink/">http://www.ncbi.nlm.nih.gov/LocusLink/</a>                                                                                                                                                                                                                                                                                                                | 14755292  |
| 0478 | flybase               | FlyBase is a comprehensive database for information on the genetics and molecular biology of <i>Drosophila</i> . <a href="http://fbserver.gen.cam.ac.uk:7081/">http://fbserver.gen.cam.ac.uk:7081/</a>                                                                                                                                                                                                                                                                                                                     | 14755292  |
| 0249 | huge                  | A Database of Human Unidentified Gene-Encoded Large Proteins Analyzed by Kazusa Human cDNA Project. <a href="http://www.kazusa.or.jp/huge/">http://www.kazusa.or.jp/huge/</a>                                                                                                                                                                                                                                                                                                                                              | 14755292  |
|      |                       | IPD provides a top level guide to the main databases that describe the proteomes of higher eukaryotic organisms. IPD effectively maintains a database of cross                                                                                                                                                                                                                                                                                                                                                             |           |

## VI. pISTil PROGRAM FLOW

This section is an overview of the **pISTil** program flow and of the most important associated messages.

### 1. Reads the **pISTil** configuration file (**config\_analyse.pm**)

- Checks `dbname`, `dbhost`, `dbuser`, `dbpass`, `path_to_databank_pattern`, `path_to_databank_blastX`
  - if success: MESSAGE: None  
RESULT: **pISTil** continues
  - if failure: MESSAGE: Error in the configuration file: Check the value of the X parameter (X for the empty parameter)!  
RESULT: **pISTil** exits immediately

### 2. Reads the **Phred** parameter given in the configuration file

- Checks if it is valid
  - if success: MESSAGE: **Phred** will be executed with or without base calling  
RESULT: **pISTil** continues
  - if failure: MESSAGE: Error in the config file. Check the value for the **Phred** parameter!  
RESULT: **pISTil** exits immediately

### 3. Archive file type

- Checks if the first argument when you start **pISTil** is a zip archive and placed in the [pISTil/dataset](#) directory
  - if success: MESSAGE: None  
RESULT: **pISTil** continues
  - if failure: MESSAGE: Error: The zip format is not correct for \$zip file.  
or Error: [dataset/\\$zip](#) does not exist.  
RESULT: **pISTil** exits immediately

### 4. Checks the bait parameter file format

- Checks if the "define\_bait" or the second argument file is properly formatted
  - if success: MESSAGE: None  
RESULT: **pISTil** continues
  - if failure: MESSAGE: ERROR: the bait parameter file \$file is not properly formatted  
RESULT: **pISTil** exits immediately

### 5. Defines the project and the library identifiers

- **pISTil** asks information about the project and the library to use.
  - \_About the project:
    - **pISTil** shows all projects in the **pISTil** database. To continue, you must choose a project identifier or create a new one.
      - if success: MESSAGE: None  
RESULT: **pISTil** continues
      - if failure: MESSAGE: Project id 'x' is not in the database.  
RESULT: **pISTil** exits immediately
  - \_About the library:

- **pISTil** shows all libraries in the **pISTil** database. To continue, you must choose a library identifier.

if success: MESSAGE: None  
RESULT: **pISTil** continues  
if failure: MESSAGE: Library id 'x' is not in the database.  
RESULT: **pISTil** exits immediately

## 6. Unzips the zip archive

- **pISTil** unzips the zip archive in a tmp directory.  
if success: MESSAGE: None  
RESULT: **pISTil** continues  
if failure: MESSAGE: Invalid Zip file:\$zip  
RESULT: **pISTil** exits immediately

## 7. Checks all raw file names according to the regex and parameters locations to define baits

- **pISTil** tries to identify the plate name, the wells locations with regex set in the configuration file.  
if success: MESSAGE: None  
RESULT: **pISTil** continues  
if failure: MESSAGE: Regex for (plate or location) is not good, please check the configuration  
RESULT: **pISTil** exits immediately

## 8. Checks if the plate has already been analysed by pISTil

- It's possible to analyse more than one time the same plate but with an other database for **BLAST** or an other **Phred** parameter

-**pISTil** checks if it's a new plate:

if success: MESSAGE: It's a new plate for this project  
RESULT: **pISTil** continues

else, **pISTil** check three possibilities:

- the plate is analysed with an other **Phred** processing
- the plate is analysed with an other database
- the plate is analysed with an other database and an other **Phred** processing

so: if this plate is already analysed with this database:

- **pISTil** checks if it's analysed with the same **Phred** parameter

if success: MESSAGE: It's the same **Phred** analysis, **pISTil** exits  
RESULT: **pISTil** exits

else: MESSAGE: This plate will be analysed with the new **Phred** parameter with the \$dbname database.

RESULT: **pISTil** continues and checks if this **Phred** processing is already done.

if success: MESSAGE: No **Phred** extraction, already done with an other db.

RESULT: **pISTil** continues without **Phred** extraction

if failure: MESSAGE: **Phred** extraction

RESULT: **pISTil** continues with new **Phred** extraction

or: if this plate is analysed with a new database:

- **pISTil** checks if we have already used the same **Phred** parameter.

if success: MESSAGE: No **Phred** extraction, already done with an other db.  
 RESULT: **pISTil** continues without **Phred** extraction  
 if failure: MESSAGE: **Phred** extraction  
 RESULT: **pISTil** continues with new **Phred** extraction

## 9. Checks if the external programs are correctly installed:

- **Phred, Pregap4, extract\_seq, blastall**  
 if success: MESSAGE: None  
 RESULT: **pISTil** continues  
 if failure: MESSAGE: Executable \$ not found!  
 RESULT: **pISTil** exits immediately

## 10. Runs Phred

- **pISTil** runs **Phred** like : *phred -nocall -id trace\_dir -cd nocall\_dir*  
 With: '-nocall' to disable basecalling  
       '-id' to read input files from <dirname>  
       '-cd' to write all scf files to <dirname>
- or **pISTil** runs **Phred** like : *phred -trim\_cutoff \$ -trim\_alt " -trim\_fasta -sa pregapdir/pregap\_full\_trim\_\$ -id trace\_dir -cd nocall\_dir*  
 With: '-nocall' to disable basecalling,  
       '-id' to read input files from <dirname>  
       '-cd' to write all scf files to <dirname>  
       '-trim\_cutoff \$' to set trimming error probability for the 'trim\_alt' option. \$ can be 0.05, 0.01 etc...  
       '-trim\_alt' to perform sequence trimming on the current sequence.  
       '-trim\_fasta' to trim sequences written to sequence and quality value FASTA file called pregap\_full\_trim\_\$ with \$=0.05, 0.01 ....

## 11. Runs Pregap4

- **pISTil** runs **Pregap4** like: *pregap4 -nowin -config \$pregap\_config -out\_dir \$pregap\_dir \$nocall\_dir/\**  
 With: '-nowin' to run **Pregap4** as a batch job  
       '-config' to specify the configuration file to **Pregap4**.

## 12. Creates all sql files to implement results data in the pISTil database

if success: MESSAGE: None  
 RESULT: **pISTil** continues  
 if failure: MESSAGE: Error: Can't create sql file!  
 RESULT: **pISTil** exits immediately

## 13. Parses all experiment files

if success: MESSAGE: None  
 RESULT: **pISTil** makes sql\_quality, sql\_trace and continues

## 14. Identify IST

if success: MESSAGE: None  
 RESULT: **pISTil** identifies preys and creates latest sql files  
 if failure: MESSAGE: No hit for raw file name  
 RESULT: **pISTil** continues with next raw files

## 15. pISTil finished

if success: MESSAGE: End **pISTil** analyzed at \$date  
RESULTS: **pISTil** asks you to add data on the database  
**pISTil** stored data in [pISTil/www/data/\\$idproject/](#)  
with \$idproject as the project identifier choose  
before the analysis.

if failure: MESSAGE: None  
RESULT: **pISTil** exits

## VII. pISTil FILES:

- The **pISTil** root directory contains the following files and folders:

|                                      |                                                                                  |
|--------------------------------------|----------------------------------------------------------------------------------|
| README                               | - <b>pISTil</b> README                                                           |
| config_analyse.pm                    | - The <b>pISTil</b> configuration file                                           |
| define_bait                          | - The bait configuration file                                                    |
| ist_analyse.pl                       | - The <b>pISTil</b> executable                                                   |
| pregap4_pistil.config                | - The local <b>Pregap4</b> config file for <b>pISTil</b>                         |
| <br>                                 |                                                                                  |
| #DIRECTORY                           |                                                                                  |
| dataset/                             | - Contains zip archive files to analyze                                          |
| dataset/HCV1.zip                     | - Zip archive file given as a first demo                                         |
| dataset/HCV2.zip                     | - Zip archive file given as a second demo                                        |
| dataset/README                       | - Dataset README                                                                 |
| <br>                                 |                                                                                  |
| db/                                  | - Contains scripts to build the <b>pISTil</b> database                           |
| db/create_database.csh               | - Shell script to build the <b>pISTil</b> database                               |
| db/data_IST.sql                      | - SQL file with default data                                                     |
| db/database_IST.sql                  | - SQL file that contains the main table structure for the <b>pISTil</b> database |
| <br>                                 |                                                                                  |
| docs/                                | - Contains the <b>pISTil</b> documentation                                       |
| docs/pISTil_doc.pdf                  | - <b>pISTil</b> documentation                                                    |
| <br>                                 |                                                                                  |
| localdb/                             | - Contains local databases for BlastX                                            |
| localdb/ensembl/                     | - Directory for Ensembl database                                                 |
| localdb/camjedb/                     | - Directory for Camjedb database                                                 |
| localdb/cygd/                        | - Directory for CYGD database                                                    |
| localdb/ddbj-embl-genbank/           | - Directory for DDBJ EMBL GenBank database                                       |
| localdb/encode/                      | - Directory for ENCODE database                                                  |
| localdb/entrez_gene_locuslink/       | - Directory for LocusLink database                                               |
| localdb/flybase/                     | - Directory for FlyBase database                                                 |
| localdb/huge/                        | - Directory for huge database                                                    |
| localdb/international_protein_index/ | - Directory for IPI database                                                     |
| localdb/mgd-mgi/                     | - Directory for MGI database                                                     |
| localdb/omim/                        | - Directory for OMIM database                                                    |
| localdb/other/                       | - Directory for other database                                                   |
| localdb/refseq/                      | - Directory for RefSeq database                                                  |
| localdb/rfam/                        | - Directory for Rfam database                                                    |
| localdb/rgd/                         | - Directory for RGD database                                                     |

|                                 |                                                                                                   |
|---------------------------------|---------------------------------------------------------------------------------------------------|
| localdb/sgd/                    | - Directory for SGD database                                                                      |
| localdb/uniparc/                | - Directory for Uniprot Archive database                                                          |
| localdb/uniprot_knowledge_base/ | - Directory for Uniprot database                                                                  |
| localdb/wormbase/               | - Directory for WormBase database                                                                 |
| localdb/pattern/                | - Directory for pattern database ( <b>BlastN</b> )                                                |
|                                 |                                                                                                   |
| /www                            | - Contains all files for the <b>pISTil</b> web interface                                          |
| /www/data                       | - Contains all results after the <b>pISTil</b> analysis which are displayed in the web interface. |
| /www/img                        | - Contains images for the interface.                                                              |
| /www/inc                        | - Contains all PHP include files for the interface.                                               |
| /www/traceviewer                | - Contains all scripts for the <b>BMC TraceViewer</b> .                                           |

- Before running the first analysis with the dataset given in example, you generate:

|                                      |  |                                      |
|--------------------------------------|--|--------------------------------------|
| localdb/refseq/refseq_human_prot.phr |  |                                      |
| localdb/refseq/refseq_human_prot.pin |  |                                      |
| localdb/refseq/refseq_human_prot.pnd |  |                                      |
| localdb/refseq/refseq_human_prot.pni |  | - refseq database for <b>BlastX</b>  |
| localdb/refseq/refseq_human_prot.psd |  |                                      |
| localdb/refseq/refseq_human_prot.psi |  |                                      |
| localdb/refseq/refseq_human_prot.psq |  |                                      |
| localdb/pattern/pPC86.nhr            |  |                                      |
| localdb/pattern/pPC86.nin            |  |                                      |
| localdb/pattern/pPC86.nsd            |  | - Pattern database for <b>BlastN</b> |
| localdb/pattern/pPC86.nsi            |  |                                      |
| localdb/pattern/pPC86.nsq            |  |                                      |
| localdb/formatdb.log                 |  | - <b>formatdb</b> logfile (optional) |

- After the first run with the HCV dataset, you will generate:

|                               |                                                                                        |
|-------------------------------|----------------------------------------------------------------------------------------|
| tmp                           | - Contains temporary files                                                             |
| www/data/1/                   | - '1' corresponds to the project identifier in the <b>pISTil</b> database              |
| www/data/1/outfile_blast_dir/ | - Contains all <b>Blast</b> result files (depends on your <b>pISTil</b> configuration) |
| www/data/1/phred_scf_dir/     | - Contains all scf trace files                                                         |
| www/data/1/qual_dir/          | - Contains all html quality files                                                      |
| www/data/1/sql_dir/           | - Contains all sql files                                                               |
| www/data/1/pISTil.log         | - <b>pISTil</b> log (depends on your <b>pISTil</b> configuration)                      |

- After a second run on the same project, you have more:

|                      |                                                  |
|----------------------|--------------------------------------------------|
| www/data/1/sql_dir_X | - Contains all sql files created in X date time. |
|----------------------|--------------------------------------------------|

## VIII. BUGS AND PROBLEMS

Some crash can occur when you run **pISTil**. Errors may be due to incorrectly configured programs required.

### 1. Environment variable STADLIB

If the run stops prematurely, displaying the message:

```
Error: Environment variable STADLIB not set. Died at ist_analyse.pl line 226
```

Then you need to define the 'STADLIB' environment variable. Please follow instructions in II.8.

### 2. Stash not found

If the run stops prematurely with the message :

```
usr/local/bin/pregap4: line 123: exec: stash: not found
main::extract_pregap4
main::get_Extracts
```

Then you must be sure that you have define in your environment variable: LD\_LIBRARY\_PATH, TCL\_LIBRARY, TK\_LIBRARY and \$STADENROOT/staden.profil (please see **Staden** Instructions for more details).

Please report **pISTil** problems and bugs to [johann.pellet@inserm.fr](mailto:johann.pellet@inserm.fr)





Database collecting nucleic or amino acid sequence mainly derived from genomic sequence.

**pattern:** Stores pattern information.

During the trace analysis the first step consists of looking for a sequence corresponding to the last nucleotids of Gal4-AD in the trace sequence (by **BLASTN** alignment), which is defined as the pattern.

**plate:** Stores information about plates.

A traditional two-hybrid plate contains 96 wells, so one plate can contain between 1 and 96 bait(s).

**ppi:** Stores physical interaction between the bait and the prey.

It corresponds to a protein-protein interaction (ppi) between a given bait protein (fused to Gal4-BD) and a prey protein (fused to Gal4-AD). If bait and prey interact, the two functional domains of Gal4 are brought closer, leading to the expression of a reporter gene in the yeast two hybrid system.

**prey:** Stores prey information.

The prey protein is fused to the activation domain (AD) of the transcription factor (Gal4-AD). It can either be a known protein in the case of a yeast two-hybrid assay, in order to test by a priori the interaction between two known proteins. It can also be an unknown protein, encoded by a cDNA of a yeast two-hybrid library.

**project:** Stores generic project information.

A project includes the analysis of one or several plate(s).

**quality:** Stores quality information sequence.

Each trace is analysed to define the sequence quality.

**reference:** Stores the bibliographic reference of a method.

**trace:** Stores trace information.

**pISTil** tries to identify each prey thanks to traces. These traces come from the sequencing of the cDNA encoding the prey protein fused to Gal4-AD (obtained by a PCR on positive yeast colonies of the yeast two-hybrid screen). **pISTil** uses **Extract\_seq** (**Pregap4** module) to extract the sequence component from traces and experiment files.

**vector:** Stores vectors information.

cDNA libraries are cloned into a yeast two-hybrid vector, allowing the expression of a prey protein fused to Gal4-AD. The resulting vectors, thus composed of a library vectors, are transformed in yeast in order to be screened by the two-hybrid method.

## Annex 2: PostgreSQL table listing

pISTil uses 16 tables to store and to process all the data. Below is a listing of each table.

| Table           | Field          | Type         | Extra       | Description                                     |
|-----------------|----------------|--------------|-------------|-------------------------------------------------|
| <b>analysis</b> |                |              |             |                                                 |
|                 | id             | Serial       | Primary Key | Unique analysis identifier                      |
|                 | nocall         | Boolean      |             | Phred extraction without base calling           |
|                 | trim           | Numeric      |             | Phred trim cutoff                               |
|                 | sequence       | Text         |             | Phred sequence extraction                       |
|                 | id_prej        | Integer      | Foreign key | Refers to Prej identifier                       |
|                 | created        | Timestamp    |             | Creation date                                   |
| <b>bait</b>     |                |              |             |                                                 |
|                 | id             | Serial       | Primary key | Unique bait identifier                          |
|                 | protid         | Varchar(100) |             | Protein identifier from public database         |
|                 | name           | Varchar(100) |             | Bait name (according to the 'define_bait' file) |
|                 | midb           | Char(4)      | Foreign key | PSI-MI identifier for public database           |
|                 | file           | Varchar(150) |             | Raw file name                                   |
|                 | location       | Char(3)      |             | Location within the plate                       |
|                 | id_plate       | Integer      | Foreign key | Refers to Plate identifier                      |
| <b>blast</b>    |                |              |             |                                                 |
|                 | id             | Integer      | Primary key | Unique blast identifier                         |
|                 | protein        | Varchar(15)  |             | Protein ID blast hit                            |
|                 | transcript     | Varchar(15)  |             | Transcript ID blast hit (if exists)             |
|                 | gene           | Varchar(15)  |             | Gene ID blast hit (if exists)                   |
|                 | frame          | Smallint     |             | Frame (0,1 or 2)                                |
|                 | hit_len        | Integer      |             | Length of the hit                               |
|                 | start_hit      | Integer      |             | Start hit location                              |
|                 | end_hit        | Integer      |             | End hit location                                |
|                 | start_query    | Integer      |             | Start query location                            |
|                 | end_query      | Integer      |             | End query location                              |
|                 | query_coverage | Smallint     |             | Coverage                                        |
|                 | score          | Smallint     |             | Blast score                                     |
|                 | identity       | Numeric      |             | Blast identity                                  |
|                 | significance   | Numeric      |             | Blast expectation value                         |
|                 | strand         | Smallint     |             | Blast strand                                    |
|                 | description    | Text         |             | Protein description (if exists)                 |
|                 | id_analysis    | Integer      | Foreign key | Refers to Analysis identifier                   |
|                 | id_db          | Integer      | Foreign key | Refers to Database identifier                   |
| <b>database</b> |                |              |             |                                                 |
|                 | id             | Serial       | Primary key | Unique database identifier                      |
|                 | category       | Varchar(100) |             | Database midb name                              |
|                 | name           | Varchar(255) |             | Unique database name                            |
|                 | midb           | Char(4)      | Foreign key | PSI-MI identifier for public database           |
|                 | species        | Varchar(100) |             | Name of the species                             |
|                 | assembly       | Varchar(100) |             | Assembly build name                             |
|                 | release        | Integer      |             | Release number                                  |
|                 | sequence_type  | Varchar(80)  |             | Sequence type (peptidic or nucleotidic)         |

|                |             |              |             |                                      |
|----------------|-------------|--------------|-------------|--------------------------------------|
|                | created     | Timestamp    |             | Creation date                        |
| <b>library</b> |             |              |             |                                      |
|                | id          | Integer      | Primary key | Unique library identifier            |
|                | name        | Varchar(150) |             | Library's name                       |
|                | supplier    | Varchar(150) |             | Supplier if you bought it            |
|                | species     | Varchar(100) |             | Species                              |
|                | tissue      | Varchar(150) |             | Tissue                               |
|                | cellular    | Varchar(150) |             | Cellular                             |
|                | gateway     | Boolean      |             | If the library is gateway compatible |
|                | id_vector   | Integer      | Foreign key | Refers to vector identifier          |
| <b>method</b>  |             |              |             |                                      |
|                | id          | Integer      | Primary key | Unique method identifier             |
|                | term        | Varchar(100) |             | Name (according to PSI-MI)           |
|                | mi          | Char(4)      |             | PSI-MI identifier                    |
|                | resid       | Varchar      |             | Reference definition                 |
|                | description | Text         |             | Description                          |
| <b>midb</b>    |             |              |             |                                      |
|                | mi          | Char(4)      |             | PSI-MI database identifier           |
|                | name        | Varchar(40)  |             | Name (according to PSI-MI)           |
|                | description | Text         |             | Description                          |
|                | xref_def    | Varchar(15)  |             | PMID (PubMed Identifier).            |
| <b>pattern</b> |             |              |             |                                      |
|                | id          | Serial       | Primary key | Unique pattern identifier            |
|                | start_hit   | Integer      |             | Start hit location                   |
|                | end_hit     | Integer      |             | End hit location                     |
|                | start_query | Integer      |             | Start query location                 |
|                | end_query   | Integer      |             | End query location                   |
|                | ali_query   | Text         |             | Nucleic query sequence aligned       |
|                | ali_homo    | Text         |             | Homology sequence                    |
|                | ali_hit     | Text         |             | Nucleic hit sequence aligned         |
|                | correction  | Boolean      |             | pISTil correction to find cDNA start |
|                | id_analysis | Integer      | Foreign key | Refers to analysis identifier        |
| <b>plate</b>   |             |              |             |                                      |
|                | id          | Serial       | Primary key | Unique plate identifier              |
|                | id_project  | Integer      | Foreign key | Refers to Project identifier         |
|                | plate       | Varchar(15)  |             | Plate containing baits               |
|                | created     | Timestamp    |             | Creation date in the database        |
| <b>ppi</b>     |             |              |             |                                      |
|                | id          | Serial       | Primary key | Unique ppi identifier                |
|                | id_bait     | Integer      | Foreign key | Refers to Bait identifier            |
|                | id_preym    | Integer      | Foreign key | Refers to Prey identifier            |
|                | id_method   | Integer      | Foreign key | Refers to Method identifier          |
|                | created     | Timestamp    |             | Creation date in the database        |
|                | updated     | Timestamp    |             | Last Update date                     |
| <b>prey</b>    |             |              |             |                                      |
|                | id          | Serial       | Primary key | Unique prey identifier               |
|                | name        | Varchar(100) |             | Raw file name                        |
|                | id_library  | Integer      | Foreign key | Refers to Library identifier         |
|                | id_plate    | Integer      | Foreign key | Refers to Plate identifier           |

| project   |                |              |             |                                             |
|-----------|----------------|--------------|-------------|---------------------------------------------|
|           | id             | Serial       | Primary Key | Unique project identifier                   |
|           | name           | Varchar(100) |             | Name of the project                         |
|           | description    | Varchar(255) |             | Description of the project                  |
|           | created        | Timestamp    |             | Creation date                               |
| quality   |                |              |             |                                             |
|           | id             | Serial       | Primary key | Unique quality identifier                   |
|           | good_start     | Smallint     |             | Start location of the good quality sequence |
|           | good_end       | Smallint     |             | End location of the good quality sequence   |
|           | good_length    | Smallint     |             | Length of the good quality sequence         |
|           | pathfile       | Varchar(150) |             | Path to the quality html file               |
|           | id_trace       | Integer      | Foreign key | Refers to Trace identifier                  |
| reference |                |              |             |                                             |
|           | id             | Integer      | Primary key | Unique pub_ref identifier                   |
|           | pmid           | Varchar(15)  |             | PMID paper reference                        |
|           | id_method      | Integer      | Foreign key | Refers to method identifier                 |
| trace     |                |              |             |                                             |
|           | id             | Serial       | Primary key | Unique trace identifier                     |
|           | pathtrace      | Varchar(150) |             | Path to the raw file                        |
|           | extract_seq    | Text         |             | Nucleic sequence extracted by Pregap4       |
|           | usable_length  | Integer      |             | Length of good quality sequence             |
|           | id_prej        | Integer      | Foreign key | Refers to Prej identifier                   |
| vector    |                |              |             |                                             |
|           | id             | Integer      | Primary key | Unique vector identifier                    |
|           | name           | Varchar(80)  |             | Vector name                                 |
|           | comment        | Text         |             | Some comments                               |
|           | sequence       | Text         |             | Nucleic sequence before cDNA                |
|           | length_pattern | Smallint     |             | Length of pattern                           |

### Annex 3: Config\_analyse.pm example, working with both HCV datasets

```
- dbname: 'pistil'
- dbhost: 'localhost'
- dbuser: 'IST_user'
- dbpass: 'istdb'
- temp_dir: 'tmp/'
- path_to_pregap_config: 'pregap4_pistil.config'
- path_to_databank_pattern: 'localdb/pattern'
- path_to_databank_blastX: 'localdb/refseq/refseq_human_prot'
- MI_method: '0018'
- phred_arg: '-nocall'
- dataset_dir: 'dataset/'
- regex_plate: '^(\w+)\-\w\d\d\-.*'
- regex_location: '^w+\-(\w\d\d)\-.*'
- save_BLASTN: 'n'
- save_BLASTX: 'n'
- log_file: 'y'
```

#### **Annex 4: Define\_bait examples**

Configuration for the plate HCV15\_1\_96 from HCV.zip file.

| First well | Last well | Bait product | Bait proteinid | PSIMI database id |
|------------|-----------|--------------|----------------|-------------------|
| A01        | H12       | NS3          | CAB46677       | 0475              |

Configuration for the plate MARIE1 from HCV2.zip file.

| First well | Last well | Bait product | Bait proteinid | PSIMI database id |
|------------|-----------|--------------|----------------|-------------------|
| A01        | F12       | NS3          | CAB46677       | 0475              |
| G01        | H02       | NS2          | CAB46677       | 0475              |
| H03        | H12       | NS3          | CAB46677       | 0475              |

If you create a new zip file with all traces from HCV1.zip and HCV2.zip you have to configure the define\_bait like this:

| First well   | Last well | Bait product | Bait proteinid | PSIMI database id |
|--------------|-----------|--------------|----------------|-------------------|
| --HCV15_1_96 |           |              |                |                   |
| A01          | H12       | NS3          | CAB46677       | 0475              |
| --MARIE1     |           |              |                |                   |
| A01          | F12       | NS3          | CAB46677       | 0475              |
| G01          | H02       | NS2          | CAB46677       | 0475              |
| H03          | H12       | NS3          | CAB46677       | 0475              |

## **Annex 5: config.inc example, working with both HCV datasets**

```
$HOST_NAME = "localhost";  
$DATABASE_NAME = "pistil";  
$DATABASE_USER = "IST_user";  
$DATABASE_PASSWORD = "istdb";
```

### **//Paths for MAMP user**

```
$LOCAL_DIR = "/Applications/MAMP/htdocs/pISTil/www/";  
$FORMATDB_EXEC = "/usr/local/bin/formatdb";  
$LOCALDB_PATH = "/Applications/MAMP/htdocs/pISTil/localdb/";
```

## **Annex 6: PSI-MI from Ontology browser for sequence databases**

List of databases commonly used to cross reference interaction data. For more information:  
<http://www.ebi.ac.uk/ontology-lookup/browse.do?ontName=MI>

| <b>MI</b> | <b>DATABASE NAME</b>   | <b>Link</b>                                                                                                               |
|-----------|------------------------|---------------------------------------------------------------------------------------------------------------------------|
| 0249      | huge                   | <a href="http://www.kazusa.or.jp/huge/">http://www.kazusa.or.jp/huge/</a>                                                 |
| 0464      | cygd                   | <a href="http://mips.gsf.de/proj/yeast/CYGD">http://mips.gsf.de/proj/yeast/CYGD</a>                                       |
| 0475      | ddbj/embl/genbank      | <a href="http://www.ebi.ac.uk/embl/Contact/collaboration">http://www.ebi.ac.uk/embl/Contact/collaboration</a>             |
| 0476      | ensembl                | <a href="http://www.ebi.ac.uk/ensembl">http://www.ebi.ac.uk/ensembl</a>                                                   |
| 0477      | entrez gene/locuslink  | <a href="http://www.ncbi.nlm.nih.gov/LocusLink/">http://www.ncbi.nlm.nih.gov/LocusLink/</a>                               |
| 0478      | flybase                | <a href="http://fbserver.gen.cam.ac.uk:7081/">http://fbserver.gen.cam.ac.uk:7081/</a>                                     |
| 0479      | mgd/mgi                | <a href="http://www.informatics.jax.org/">http://www.informatics.jax.org/</a>                                             |
| 0480      | omim                   | <a href="http://www.ncbi.nlm.nih.gov/entrez/query.fcgi?db=OMIM">http://www.ncbi.nlm.nih.gov/entrez/query.fcgi?db=OMIM</a> |
| 0481      | refseq                 | <a href="http://www.ncbi.nlm.nih.gov/RefSeq/">http://www.ncbi.nlm.nih.gov/RefSeq/</a>                                     |
| 0482      | rfam                   | <a href="http://www.sanger.ac.uk/Software/Rfam/">http://www.sanger.ac.uk/Software/Rfam/</a>                               |
| 0483      | rgd                    | <a href="http://rgd.mcw.edu/">http://rgd.mcw.edu/</a>                                                                     |
| 0484      | sgd                    | <a href="http://www.yeastgenome.org/">http://www.yeastgenome.org/</a>                                                     |
| 0485      | uniparc                | <a href="http://www.ebi.ac.uk/uniparc/">http://www.ebi.ac.uk/uniparc/</a>                                                 |
| 0486      | uniprot knowledge base | <a href="http://www.expasy.uniprot.org/">http://www.expasy.uniprot.org/</a>                                               |
| 0487      | wormbase               | <a href="http://www.wormbase.org/">http://www.wormbase.org/</a>                                                           |
| 0675      | IPI                    | <a href="http://www.ebi.ac.uk/IPI/IPIhelp.html">http://www.ebi.ac.uk/IPI/IPIhelp.html</a>                                 |
| 0850      | encode                 | <a href="http://www.genome.gov/10005107">http://www.genome.gov/10005107</a>                                               |
| 0924      | camjedb                | <a href="http://www.sanger.ac.uk/Projects/C_jejuni/">http://www.sanger.ac.uk/Projects/C_jejuni/</a>                       |



## Annex 7: Vector pPC86 used for the HCV examples and its pattern

We selected the 87 last nucleotides of *GAL4-AD* encoding-sequence as the pattern to determine the Gal4-AD frame. This sequence was chosen as it is downstream of the Y2HAD primer used for PCR and sequencing the cDNA cloned in pPC86.

The sequence next the pattern was analysed by **BlastX** against a protein database corresponding to the organism of library screened (in our case, the human).

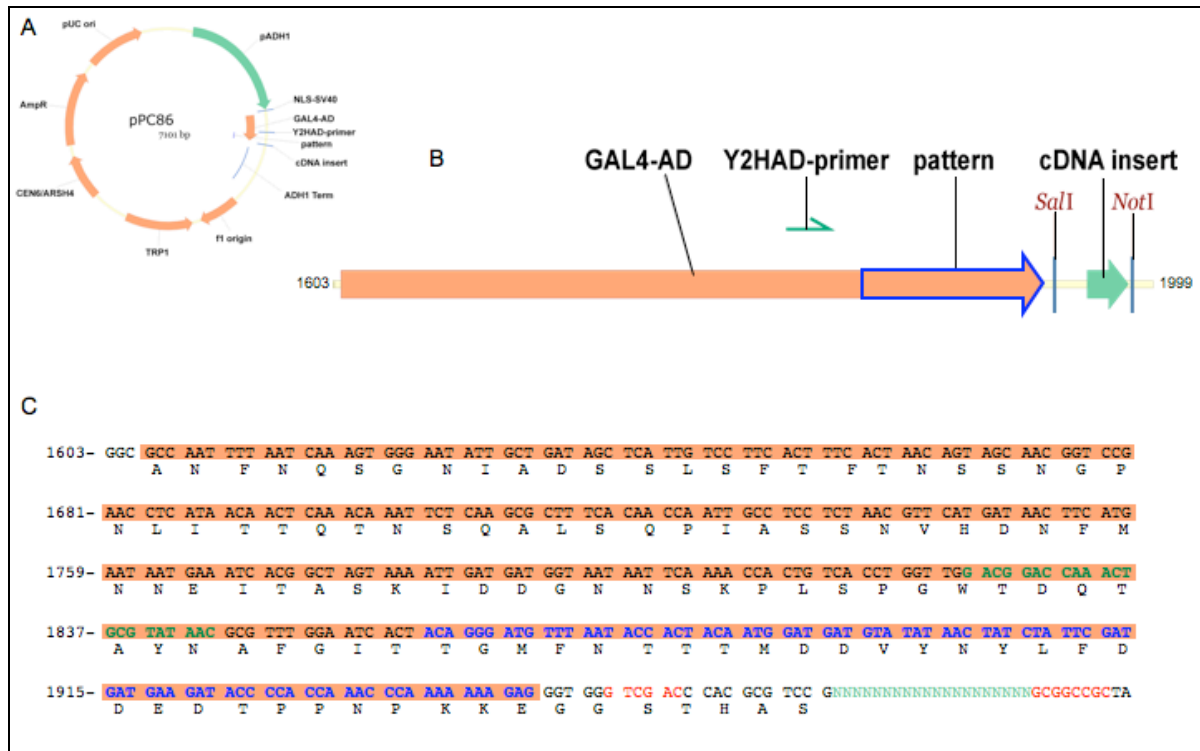

A. pPC86 vector map

B. Zoom of pPC86 cloning site (nt 1603-1999). Sequences of *GAL4-AD* and cDNA restriction sites are labeled. Also shown, the Y2HAD primer binding site (green) and the pattern (blue).

C. Nucleotidic (and amino acid) sequence of pPC86 cloning site. Sequence highlighted in orange corresponds to *GAL4-AD* (aa 768-881 of Gal4). Sequences in green represents Y2HAD primer binding site, in blue the pattern and in red the restriction sites of cDNA in pPC86.

## Annex 8: pISTil workflow schema

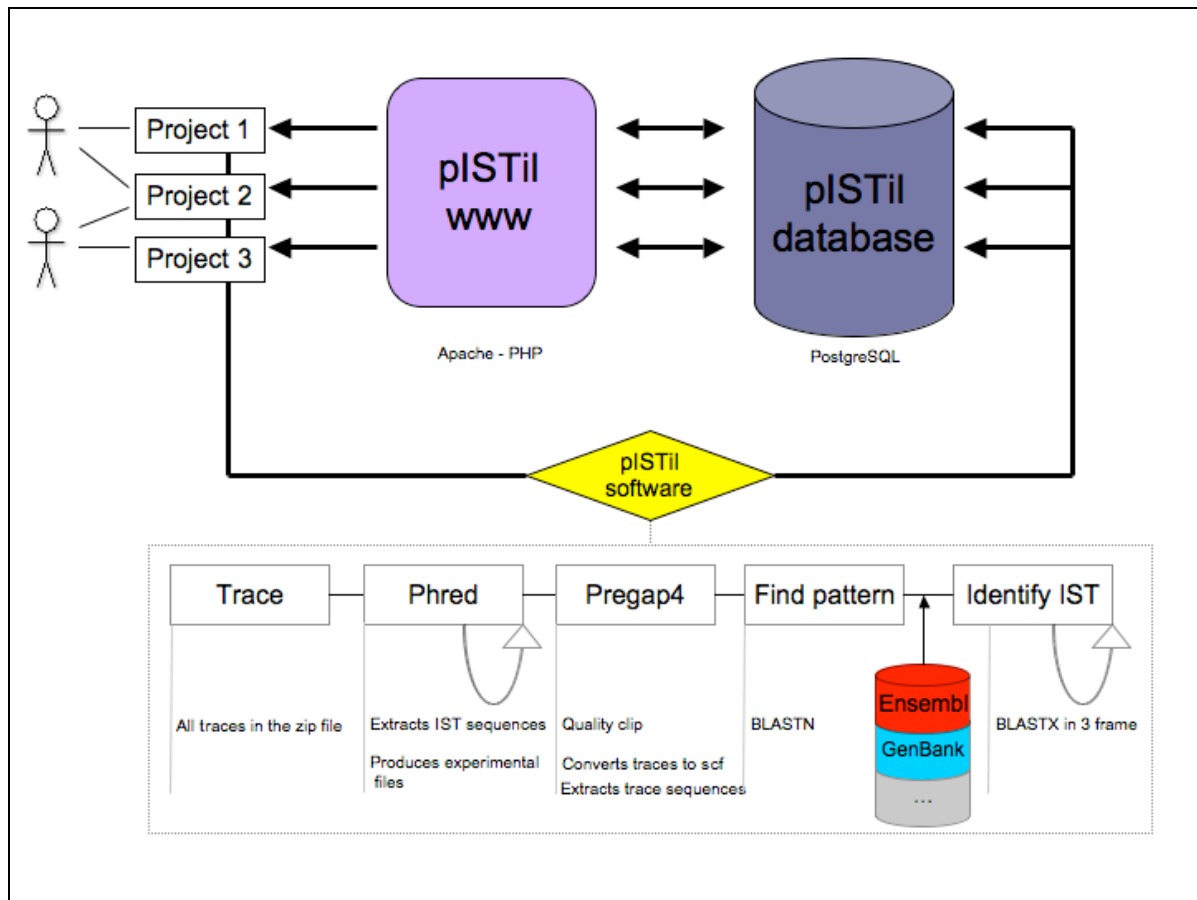

**pISTil** is organized around three major components. The **pISTil** software analyses chromatogram files (traces) organized by project. In this case, three different projects are shown with two users. The **pISTil** web application can provide visualization for any number of projects. The **pISTil** database shares all analysis information. We represent by an arrow the possibility to use **pISTil** more than one time with the same dataset changing **Phred** base calling argument or database for the **BLASTX**.

## Annex 9: The trace sequence, according to several Phred processing options

```

CLUSTAL 2.0.10 multiple sequence alignment

HCV15          GGGGTAAACCCCAACCATTGTGATGATGTATATAACTATCTATCTCGATGATGAAGATACC 60
HCV15_trimmed_0.01 -----ATGATGAAGATACC 14
HCV15_trimmed_0.05 -----GTATATAACTATCTATCTCGATGATGAAGATACC 34
*****

HCV15          CCACCAAAACCCAAAAAAGAGGGTGGGTGGAC@CACGGGTCCGGCCACGGGTCGGGTGA 120
HCV15_trimmed_0.01 CCACCAAAACCCAAAAAAGAGGGTGGGTGGAC@CACGGGTCCGGCCACGGGTCGGGTGA 74
HCV15_trimmed_0.05 CCACCAAAACCCAAAAAAGAGGGTGGGTGGAC@CACGGGTCCGGCCACGGGTCGGGTGA 94
*****

HCV15          COTAAACCAATGAAGAACAACCTGATTCACCACTTCTAARAATCAGCCCATCTGAAGATAC 180
HCV15_trimmed_0.01 COTAAACCAATGAAGAACAACCTGATTCACCACTTCTAARAATCAGCCCATCTGAAGATAC 134
HCV15_trimmed_0.05 COTAAACCAATGAAGAACAACCTGATTCACCACTTCTAARAATCAGCCCATCTGAAGATAC 154
*****

HCV15          TCAGCAAGAAAATGGCAGCATGTTCTCTCTCA@TACCTGGAAATTTGATGGATTAGATCT 240
HCV15_trimmed_0.01 TCAGCAAGAAAATGGCAGCATGTTCTCTCTCA@TACCTGGAAATTTGATGGATTAGATCT 194
HCV15_trimmed_0.05 TCAGCAAGAAAATGGCAGCATGTTCTCTCTCA@TACCTGGAAATTTGATGGATTAGATCT 214
*****

HCV15          AAACAATCTGTTCAGAGAGGGTTCGAGGGGTGT@TTCCTACTAGCTTTGTACAGCCCA 300
HCV15_trimmed_0.01 AAACAATCTGTTCAGAGAGGGTTCGAGGGGTGT@TTCCTACTAGCTTTGTACAGCCCA 254
HCV15_trimmed_0.05 AAACAATCTGTTCAGAGAGGGTTCGAGGGGTGT@TTCCTACTAGCTTTGTACAGCCCA 274
*****

HCV15          TGTGATATTTCTACAGGAAGTTATTCGCCCAT@TTATAGCTACCTAAAGAAGAGATCAAG 360
HCV15_trimmed_0.01 TGTGATATTTCTACAGGAAGTTATTCGCCCAT@TTATAGCTACCTAAAGAAGAGATCAAG 314
HCV15_trimmed_0.05 TGTGATATTTCTACAGGAAGTTATTCGCCCAT@TTATAGCTACCTAAAGAAGAGATCAAG 334
*****

HCV15          TAATTATGAGATTATTACAGGTCATGAAGAAG@ATATTCACAGCTATAATGTTGAAGAA 420
HCV15_trimmed_0.01 TAATTATGAGATTATTACAGGTCATGAAGAAG@ATATTCACAGCTATAATGTTGAAGAA 374
HCV15_trimmed_0.05 TAATTATGAGATTATTACAGGTCATGAAGAAG@ATATTCACAGCTATAATGTTGAAGAA 394
*****

HCV15          ATCAGAGTGAAATTAAGAGCCAGAGATTATTCCTTTTCCAGTACCAAAATGATGAG 480
HCV15_trimmed_0.01 ATCAGAGTGAAATTAAGAGCCAGAGATTATTCCTTTTCCAGTACCAAAATGATGAG 434
HCV15_trimmed_0.05 ATCAGAGTGAAATTAAGAGCCAGAGATTATTCCTTTTCCAGTACCAAAATGATGAG 454
*****

HCV15          AAACCTTTTATGTGTCAATGGAATGTGTCAAGAAATGAGCTTTGCCCTTATGACATCCCA 540
HCV15_trimmed_0.01 AAACCTTTTATGTGTCAATGGAATGTGTCAAGAAATGAGCTTTGCCCTTATGACATCCCA 494
HCV15_trimmed_0.05 AAACCTTTTATGTGTCAATGGAATGTGTCAAGAAATGAGCTTTGCCCTTATGACATCCCA 514
*****

HCV15          TTTGGAGGCCACAGAGGGCATGCTGGGGAAC@AATGAATCAGTTAAAAATGGTTTTAAA 600
HCV15_trimmed_0.01 TTTGGAGGCCACAGAGGGCATGCTGGGGAAC@AATGAATCAGTTAAAAATGGTTTTAAA 554
HCV15_trimmed_0.05 TTTGGAGGCCACAGAGGGCATGCTGGGGAAC@AATGAATCAGTTAAAAATGGTTTTAAA 574
*****

HCV15          GAAATGCAAGAGGCTCCAGAGTCAGCTACAGTATATTTCCAGGAGATACAAATCTAAG 660
HCV15_trimmed_0.01 GAAATGCAAGAGGCTCCAGAGTCAGCTACAGTATATTTCCAGGAGATACAAATCTAAG 614
HCV15_trimmed_0.05 GAAATGCAAGAGGCTCCAGAGTCAGCTACAGTATATTTCCAGGAGATACAAATCTAAG 634
*****

HCV15          GGATCGAGAGGTTACCAGATGTGGTGGTTA@C@CAACCAATGTTGGATGTCGGGAGTT 720
HCV15_trimmed_0.01 GGATCGAGAGGTTACCAGATGTGGTGGTTA@C@CAACCAATGTT-----659
HCV15_trimmed_0.05 GGATCGAGAGGTTACCAGATGTGGTGGTTA@C@CAACCAATGTTGGATGTCGGGAGTT 694
*****

HCV15          TTTGGGCAAACTAAACATTTGCCAGTATACA@GGGATACACAATGA@CTTAATCTTG 780
HCV15_trimmed_0.01 -----717
HCV15_trimmed_0.05 -----717

HCV15          AAAATAGTCTGCTGTGTAACCTCATTAGGATCAAAATTTTTTCAACACAGCAGCAAAAG 840
HCV15_trimmed_0.01 -----
HCV15_trimmed_0.05 -----

```

**pISTil** can analyse traces with different parameters, like **Phred** trimming. Here you can visualize a **ClustalW** alignment that highlights the difference for the same sequence between different extractions. HCV15 is extracted without trimming, HCV15\_trimmed\_0.01 is extracted with trim cutoff 0.01 and HCV15\_trimmed\_0.05 is extracted with trim cutoff 0.05. **Phred** finds the longest fragment in a sequence where the estimated error rate is below the cutoff value. For more explanation about the **Phred** trimming, please see the **Phred** documentation.

### **Annex 10: Interaction Sequence Tag (IST) identification pipeline statistics**

The number of ISTs, distinct protein-protein interactions (ppi) and distinct host proteins generated by Infection MAPping (I-MAP) team, with the complete HCV dataset, are given before filtering, for each filter and with all filters (significant ppi).

| <b>IST identification by pISTil</b>       |      |     |          |
|-------------------------------------------|------|-----|----------|
|                                           | ISTs | ppi | proteins |
| Without filtering                         | 1158 | 477 | 395      |
| Identity $\geq$ 80%, e-value $\leq$ 1E-10 | 578  | 208 | 186      |
| In frame                                  | 653  | 243 | 207      |
| <b>All filters (significant)</b>          | 443  | 132 | 117      |

**Annex 11: Schema of the BLASTN and the split correction to find the cDNA start.**

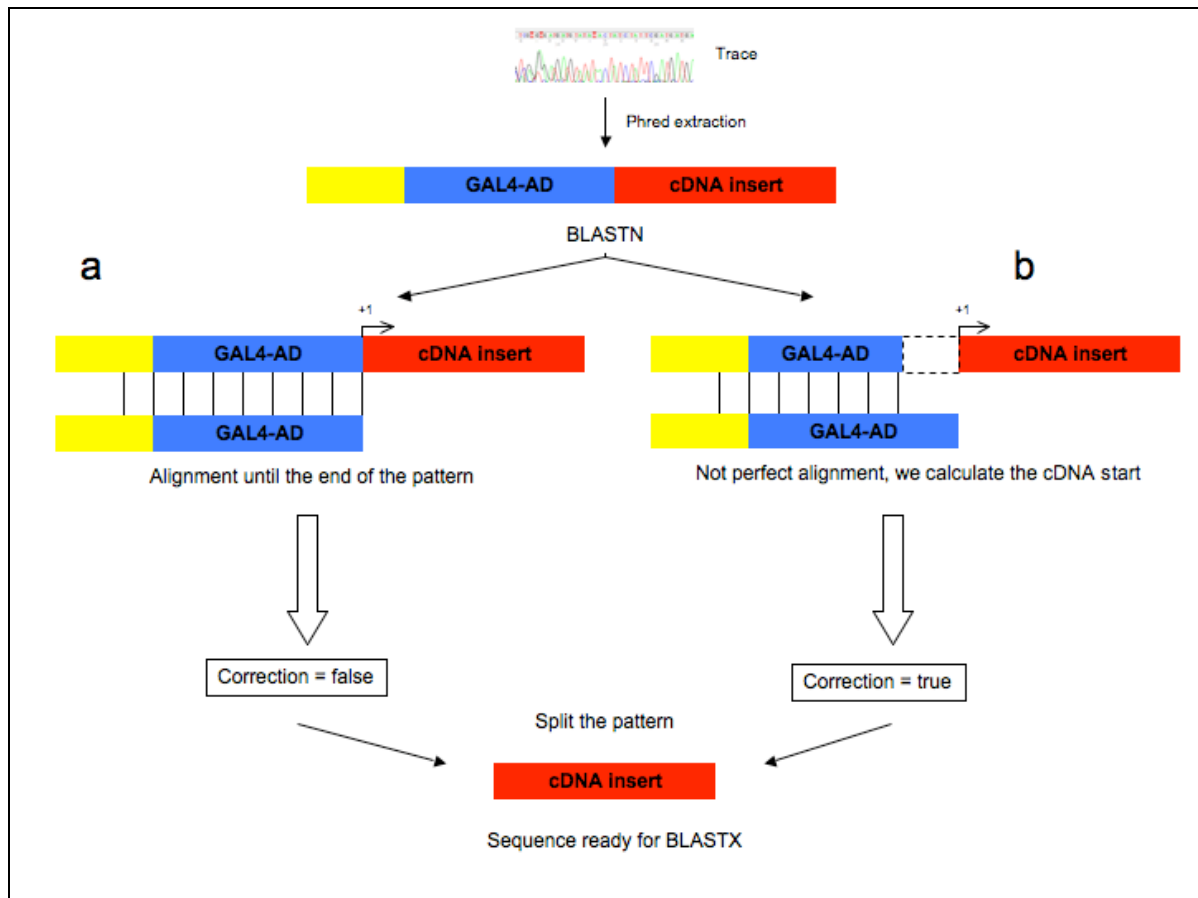

We use **BLASTN** to search the pattern GAL4-AD placed before the cDNA. If the alignment is perfect, the term correction is set to false (a). However, since the pattern is at the beginning of the sequence, it is possible that the alignment is not perfect (b). If the end of the alignment between the pattern and the IST is not the end of the pattern, we calculate the cDNA start by adding the number of missing bases, and the term correction is set to true.
